# Supplementary material for: Effect of COVID-19 lockdown on child protection medical assessments: a retrospective observational study in Birmingham, UK
Source: PubMed Central journal article supplement — BMJ Open. 2020 Sep 29;10(9):e042867. doi: 10.1136/bmjopen-2020-042867 (PMC7526028; doi:10.1136/bmjopen-2020-042867), 2020-09-29
Supplement: bmjopen-2020-042867.draft_revisions.pdf [file bmjopen-2020-042867.draft_revisions.pdf]

# BMJ Open

BMJ Open is committed to open peer review. As part of this commitment we make the peer review history of every article we publish publicly available.

When an article is published we post the peer reviewers' comments and the authors' responses online. We also post the versions of the paper that were used during peer review. These are the versions that the peer review comments apply to.

The versions of the paper that follow are the versions that were submitted during the peer review process. They are not the versions of record or the final published versions. They should not be cited or distributed as the published version of this manuscript.

BMJ Open is an open access journal and the full, final, typeset and author-corrected version of record of the manuscript is available on our site with no access controls, subscription charges or pay-per-view fees (<http://bmjopen.bmj.com>).

If you have any questions on BMJ Open's open peer review process please email [info.bmjopen@bmj.com](mailto:info.bmjopen@bmj.com)

# BMJ Open

## Effect of covid-19 lockdown on child protection medical assessments: a retrospective observational study in Birmingham, UK

|                               |                                                                                                                                                                                                                                                                                                                                                                                                                                                                                                                                                                                                                                                                                                                                                                                                                                                                                                                                                                                                     |
|-------------------------------|-----------------------------------------------------------------------------------------------------------------------------------------------------------------------------------------------------------------------------------------------------------------------------------------------------------------------------------------------------------------------------------------------------------------------------------------------------------------------------------------------------------------------------------------------------------------------------------------------------------------------------------------------------------------------------------------------------------------------------------------------------------------------------------------------------------------------------------------------------------------------------------------------------------------------------------------------------------------------------------------------------|
| Journal:                      | <i>BMJ Open</i>                                                                                                                                                                                                                                                                                                                                                                                                                                                                                                                                                                                                                                                                                                                                                                                                                                                                                                                                                                                     |
| Manuscript ID                 | bmjopen-2020-042867                                                                                                                                                                                                                                                                                                                                                                                                                                                                                                                                                                                                                                                                                                                                                                                                                                                                                                                                                                                 |
| Article Type:                 | Original research                                                                                                                                                                                                                                                                                                                                                                                                                                                                                                                                                                                                                                                                                                                                                                                                                                                                                                                                                                                   |
| Date Submitted by the Author: | 16-Jul-2020                                                                                                                                                                                                                                                                                                                                                                                                                                                                                                                                                                                                                                                                                                                                                                                                                                                                                                                                                                                         |
| Complete List of Authors:     | Garstang, Joanna; Birmingham Community Healthcare NHS Trust; University of Birmingham, College of Medical and Dental Sciences, Debelle, Geoff; Birmingham Children's Hospital, Paediatrics; University of Birmingham, College of Medical and Dental Sciences, Anand, Indu; Birmingham Community Healthcare NHS Trust Armstrong, Jane; Birmingham Community Healthcare NHS Trust Botcher, Emily; Birmingham Community Healthcare NHS Trust Chaplin, Helen; Birmingham Community Healthcare NHS Trust Morgans, Clare; Birmingham Community Healthcare NHS Trust Hallett, Nutmeg; University of Birmingham , College of Medicine and Dentistry Price, Malcolm; University of Birmingham , College of Medicine and Dentistry Tan, Ern Ern Henna; Birmingham Community Healthcare NHS Trust Tudor, Emily; Birmingham Community Healthcare NHS Trust Taylor, Julie; University of Birmingham, College of Medical and Dental Sciences, ; Birmingham Women's and Children's Hospital NHS Foundation Trust., |
| Keywords:                     | Child protection < PAEDIATRICS, Community child health < PAEDIATRICS, Non-accidental injury < PAEDIATRICS                                                                                                                                                                                                                                                                                                                                                                                                                                                                                                                                                                                                                                                                                                                                                                                                                                                                                           |
|                               |                                                                                                                                                                                                                                                                                                                                                                                                                                                                                                                                                                                                                                                                                                                                                                                                                                                                                                                                                                                                     |

SCHOLARONE™  
Manuscripts

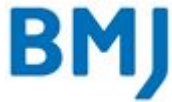

I, the Submitting Author has the right to grant and does grant on behalf of all authors of the Work (as defined in the below author licence), an exclusive licence and/or a non-exclusive licence for contributions from authors who are: i) UK Crown employees; ii) where BMJ has agreed a CC-BY licence shall apply, and/or iii) in accordance with the terms applicable for US Federal Government officers or employees acting as part of their official duties; on a worldwide, perpetual, irrevocable, royalty-free basis to BMJ Publishing Group Ltd ("BMJ") its licensees and where the relevant Journal is co-owned by BMJ to the co-owners of the Journal, to publish the Work in this journal and any other BMJ products and to exploit all rights, as set out in our [licence](#).

The Submitting Author accepts and understands that any supply made under these terms is made by BMJ to the Submitting Author unless you are acting as an employee on behalf of your employer or a postgraduate student of an affiliated institution which is paying any applicable article publishing charge ("APC") for Open Access articles. Where the Submitting Author wishes to make the Work available on an Open Access basis (and intends to pay the relevant APC), the terms of reuse of such Open Access shall be governed by a Creative Commons licence – details of these licences and which [Creative Commons](#) licence will apply to this Work are set out in our licence referred to above.

Other than as permitted in any relevant BMJ Author's Self Archiving Policies, I confirm this Work has not been accepted for publication elsewhere, is not being considered for publication elsewhere and does not duplicate material already published. I confirm all authors consent to publication of this Work and authorise the granting of this licence.

# Effect of covid-19 lockdown on child protection medical assessments: a retrospective observational study in Birmingham, UK.

## Title page

1 Dr Joanna Garstang<sup>1,2,4\*</sup> [Joanna.garstang@nhs.net](mailto:Joanna.garstang@nhs.net) Consultant Community Paediatrician, Designated Doctor for Child Death <https://orcid.org/0000-0001-9268-0581>

2 Dr Geoff DeBelle<sup>3,4</sup> [g.debelle@nhs.net](mailto:g.debelle@nhs.net) Consultant Community and General Paediatrician, Designated Doctor for Safeguarding Children <https://orcid.org/0000-0002-0450-3129>

3 Dr Indu Anand<sup>1</sup> [indu.anand@nhs.net](mailto:indu.anand@nhs.net) Consultant Community Paediatrician, Named Doctor for Safeguarding Children

4 Dr Jane Armstrong<sup>1,4</sup> [jane.armstrong2@nhs.net](mailto:jane.armstrong2@nhs.net) Consultant Community Paediatrician, Designated Doctor for Safeguarding Children <https://orcid.org/0000-0003-0380-4162>

5 Dr Emily Botcher<sup>1</sup> [emily.botcher@nhs.net](mailto:emily.botcher@nhs.net) Speciality Trainee in Community Paediatrics <https://orcid.org/0000-0003-7059-3516>

6 Dr Helen Chaplin<sup>1,4</sup> [helenchaplin@nhs.net](mailto:helenchaplin@nhs.net) Consultant Community Paediatrician and Designated Doctor for Safeguarding Children <https://orcid.org/0000-0001-7059-3516>

7 Dr Nutmeg Hallett<sup>2</sup> [N.N.Hallett@bham.ac.uk](mailto:N.N.Hallett@bham.ac.uk) Lecturer/Research Fellow <https://orcid.org/0000-0003-3115-8831>

8 Dr Clare Morgans<sup>1</sup> [cmorgans@nhs.net](mailto:cmorgans@nhs.net) Speciality Trainee in Community Paediatrics <https://orcid.org/0000-0002-6556-8153>

9 Dr Malcolm Price<sup>2</sup> [m.price@bham.ac.uk](mailto:m.price@bham.ac.uk) Lecturer in Biostatistics <https://orcid.org/0000-0002-7352-3027>

10 Dr Ern Ern Henna Tan<sup>1</sup> [e.tan@nhs.net](mailto:e.tan@nhs.net) Speciality Trainee in Paediatrics <https://orcid.org/0000-0002-8314-512X>

11 Dr Emily Tudor<sup>1</sup> [emily.tudor@nhs.net](mailto:emily.tudor@nhs.net) Speciality Trainee in Community Paediatrics <https://orcid.org/0000-0002-0302-9883>

12 Professor Julie Taylor<sup>2,3,§</sup> [j.taylor.1@bham.ac.uk](mailto:j.taylor.1@bham.ac.uk) Professor of Child Protection <https://orcid.org/0000-0002-7259-0906>

<sup>1</sup>Birmingham Community Healthcare NHS Foundation Trust

<sup>2</sup>College of Medicine and Dentistry, University of Birmingham, Edgbaston, Birmingham, UK

<sup>3</sup>Birmingham Women's and Children's NHS Foundation Trust

<sup>4</sup>Birmingham and Solihull Clinical Commissioning Group

\*Lead Author address: Birmingham Community Healthcare NHS Trust, & University of Birmingham. Allens Croft Children's Centre, Birmingham, B14 6RP, UK

§Corresponding author address: College of Medical and Dental Science, University of Birmingham, Edgbaston, B15 2TT, UK

# Effect of covid-19 lockdown on child protection medical assessments: a retrospective observational study in Birmingham, UK.

## Abstract

### Objectives

To determine any change in referral patterns and outcomes in children (0-18) referred for child protection medical examination (CPME) during the covid-19 pandemic compared to previous years.

### Design

Retrospective observational study, analysing routinely collected clinical data from CPME reports in a rapid response to the pandemic lockdown.

### Setting

Birmingham Community Healthcare NHS Trust, which provides all routine CPME for Birmingham, England, population 1.1 million including 288,000 children.

### Participants

Children aged under 18 years attending CPME during an 18 week period from late February to late June during the years 2018, 2019, and 2020.

### Main Outcome Measures

Numbers of referrals, source of disclosure and outcomes from CPME

### Results

There were 78 CPME referrals in 2018, 75 in 2019 and 47 in 2020, this was a 39.7% (95%CI 12.4-59.0) reduction in referrals from 2018 to 2020, and a 37.3% (95%CI 8.6-57.4) reduction from 2019 to 2020.

1  
2  
3 There were fewer CPME referrals initiated by school staff in 2020, 12(26%) compared to 36 (47%)  
4 and 38 (52%) in 2018 and 2019 respectively. In all years 75.9% of children were known to social care  
5 prior to CPME, and 94% of CPME concluded that there were significant safeguarding concerns.  
6  
7  
8

## 9 Conclusions

10 School closure due to covid-19 may have harmed children as child abuse has remained hidden.  
11 There needs to be either mandatory attendance at schools in future or viable alternatives found.  
12  
13 There may be a significant increase in safeguarding referrals when schools fully re-open as children  
14 disclose the abuse they have experienced at home.  
15  
16  
17  
18

## 19 Article summary: Strengths and Limitations of the Study

- 20  
21  
22
- 23 • This is a highly robust study: we obtained CPME reports for 97% of CPME referrals during the  
24 study period.
  - 25 • We ensured consistency of data extraction by double reviewing every report, with further  
26 consensus discussions for the few cases that raised uncertainties.
  - 27 • The team extracting the data comprised highly experienced paediatricians with expertise in  
28 child abuse.
  - 29 • One weakness is that we only considered minor injuries from outpatient CPME, excluding  
30 those admitted to hospital, so our findings do not include those with more serious NAI,  
31 however they would be taken to hospital for treatment due to the severity of their injuries.  
32  
33

34 **Keywords:** child abuse; non-accidental injury; paediatrics; child protection medical examination.

35  
36  
37 **Funding statement:** The study was not funded. JG is funded by West Midlands Clinical Research  
38 Network (NIHR) as a Clinical Trials Scholar. MP is supported by the NIHR Birmingham Biomedical  
39 Research Centre at the University Hospitals Birmingham NHS Foundation Trust and the University of  
40 Birmingham. The views expressed are those of the authors and not necessarily those of the NHS, the  
41 NIHR or the Department of Health and Social Care. The University of Birmingham funded the article  
42 processing charge.  
43  
44  
45  
46

47 **Competing interest statement:** There are no competing interests to declare.  
48  
49  
50  
51  
52  
53  
54  
55  
56  
57  
58  
59  
60

## Introduction

Nearly 400,000 children in England each year are defined as 'children in need'; these are children who require additional services, including safeguarding, to maintain a satisfactory level of health or development(1). Since the lockdown began, there are burgeoning concerns that child protection referrals have decreased, with professionals reporting limited opportunities to make accurate assessments of children's needs(2). Statutory guidance sets out the specific roles and responsibilities of agencies for undertaking child protection enquiries when a child or young person is referred for suspected maltreatment(3), including formal child protection medical examinations (CPME). The purpose of CPME is to provide a holistic assessment of the child's health, document any injuries and determine possible causes including the reasonable likelihood of injuries being inflicted or non-inflicted. A report is provided to inform any child protection investigations. CPMEs are performed or supervised by an experienced consultant paediatrician (4), adhering to rigorous standards in respect of consent; conduct of the examination; documentation of history; findings and formulation; photo-documentation; and report writing(5), with reports subject to regular peer review(6).

Birmingham is the second largest city in the UK, with a diverse population and is the largest local authority in Europe. It is also a relatively young city, with 23% of its population being children under the age of 16 years(7). The proportion of children subject to a child protection plan is higher than for the UK as a whole(8) and thirty-five percent of children live in poverty(8). In Birmingham CPMEs are generally undertaken within a community setting during working hours, often for children who have disclosed maltreatment to school or nursery staff, who then refer them to Birmingham Children's Trust (social care). Children with suspected sexual abuse are assessed separately, within specialised, regional child sexual assault referral centres. Hospital-based paediatricians perform CPMEs for those children with more significant injuries requiring treatment and for out-of-hours referrals. During the covid-19 lockdown the community based CPME service provided extended hours (6 April to 23 May 2020) that covered evenings and weekends to minimise hospital attendance so an increase in referrals for CPME was expected.

Schools are at the frontline of child safeguarding; educational staff are often the first to report potential child abuse. This raises concerns that vulnerable children are now invisible to professionals and potentially 'at risk' in homes where families face even greater hardships(8). Such 'collateral damage'(9) has been borne out by evidence that only 10% of children on a child protection plan or 'in-need' were attending schools that were remaining open specifically for their benefit and even where schools are open for selected year groups, attendance remains very low (10).

1  
2  
3 Although there has been much professional concern about the potential risk children have faced at  
4 home there have been limited data, with one report of an increase in abusive head trauma noted in  
5 London (11) and a short report from the North-East of England noting a dramatic decrease in CPME  
6 referrals (12). This current study was designed as a rapid response to fill gaps in knowledge about  
7 child protection referrals during the covid-19 pandemic.  
8  
9

10  
11  
12 The aim was to determine differences in the number and outcomes of child protection referrals for  
13 CPME in Birmingham during the covid-19 pandemic lockdown (March to June 2020) compared with  
14 the same periods in 2018 and 2019. Our research questions were:  
15  
16

17  
18 What is the difference in child protection referrals during the covid-19 pandemic compared to  
19 previous years?  
20

21  
22 Are there differences in demographic details, referral source and outcomes for children presenting  
23 for child protection medical examination during the covid-19 pandemic compared to previous years?  
24  
25

## 26 27 Methods

### 28 29 30 Study design

31  
32 Retrospective observational study of referrals for CPME. It adhered to STROBE guidance (13).  
33  
34

### 35 36 Setting and sample

37  
38 All children aged 0-18 attending for CPME at Birmingham Community Healthcare Trust (BCHT),  
39 England. BCHT provides specialist CPME for the population of Birmingham, total population 1.1  
40 million of which 288,000 are children aged <18 (7). Data were collected for all CPME for 18-week  
41 periods in 2018, 2019 and 2020, from the last week in February, when schools returned following  
42 the half-term holiday, to the end of June.  
43  
44  
45

### 46 47 Procedure

48  
49 We obtained a list of all children referred for CPME from the booking service and accessed the  
50 electronic patient records (EPR) for these children, obtaining copies of reports from CPME. We read  
51 the reports, and completed an anonymised data extraction form for each CPME (on-line  
52 supplementary file 1). The data collection form was in three parts: i) child demographic data,  
53 including age, gender, school age group (pre-school, primary, secondary, post-16), in a special school  
54 or not, ii) referral details including whether an index case or referred as a sibling group, source of  
55 initial disclosure, who the allegation was against, whether the child had previous referral to social  
56  
57  
58  
59  
60



1  
2  
3 care and if so, the current social care status, and whether the child had ever been on a child  
4 protection plan, and iii) outcomes of the CPME including whether there were physical findings to  
5 support non-accidental injury (NAI) or neglect, and, if so, what were the physical findings; likelihood  
6 of NAI; whether NAIs were present on more than one body part; were their injuries consistent with  
7 previous NAI; whether the report indicated significant safeguarding concerns; if the concerns were  
8 related to factors other than NAI; and, if so, what?  
9

10 Outcomes were taken either directly from the conclusion of the CPME report, or if the conclusion  
11 was unclear, were determined based on the description of injuries and events within the report. If  
12 the CPME was not available, we used the EPR for demographics, referral source and safeguarding  
13 history, omitting data on outcomes of CPME.  
14

15 Prior to commencing data extraction, all the clinicians reviewed 10 anonymised CPME reports which  
16 were then reviewed and discussed by the whole group. This enabled any differences in  
17 interpretation of CPME to be resolved and ensured quality and consistency of data extraction.  
18

19 Clinicians worked in pairs, consisting of a specialist consultant in child protection (either Named or  
20 Designated Doctors for Safeguarding) and a specialist trainee in paediatrics, all of whom have a  
21 minimum of four years postgraduate medical training in child health. Each case had data extracted  
22 independently by the consultant and trainee, to ensure consistency. In the event of disagreement  
23 the case was reviewed by another consultant.  
24

## 25 Study size

26 As this was an observational study, no sample size calculation was undertaken. The time period  
27 included the last week in February which was before there was significant concern in schools about  
28 covid-19. Data collection continued for the month of June to enable any change in referral CPME  
29 patterns with the partial reopening of some primary schools.  
30

## 31 Statistical analysis

32 Anonymised data were entered into SPSS. Cases were analysed by the year of referral. If children  
33 had more than one CPME during the study period, each CPME was considered as a separate case.  
34 Referral rates between years for the whole 18-week period were compared using incidence rate  
35 ratios (IRR). IRRs for two weekly time-periods comparing 2018/19 with 2020 were also calculated  
36 and plotted on a graph with 95% confidence intervals. To compare differences in variables between  
37 the years, Kruskal-Wallis tests were run for continuous variables (age, number of types of injuries)  
38 and chi-square tests were run for categorical variables.  
39  
40  
41  
42  
43  
44  
45  
46  
47  
48  
49  
50  
51  
52  
53  
54  
55  
56  
57  
58  
59  
60

## Ethics

This study involved clinicians analysing routinely collected patient data, from patients within their own clinical service, it therefore does not require HRA ethical approval. The study was approved by the Research and Innovation Department in Birmingham Community Healthcare Trust.

## Patient and public involvement

As a rapid observational study using retrospective records we were unable to include children who had been through a CPME or their parents in the study. However we have a Children and Young People's Advisory Group whom we intend to involve in the dissemination and guidelines for practitioners.

## Results

There were 200 CPMEs during the study period; 193 had CPME reports available with complete information from 191.

### Referral numbers

There were fewer CPME referrals in 2020 compared to previous years, as shown in figure 1. There was a 39.7% (95%CI 12.4-59.0) reduction in referrals from 2018 to 2020, and a 37.3% (95%CI 8.6-57.4) reduction from 2019 to 2020. The IRR for 2020 compared to 2018/19 was 0.61 (95%CI 0.43-0.86) showing an overall reduction of 39% (95% CI 14%-57%).

< Figure 1 (Cumulative number of referral) about here >

The two weekly data shows that there was a significant drop in referrals for a 6-week period from weeks 3/4 to weeks 7/8, see figure 2. There was some evidence of an increase in referrals during weeks 9/10 in 2020 after which referral rates were broadly similar, with all confidence intervals crossing 1, apart from weeks 15/16 when there were no referrals in 2020.

< Figure 2 (IRR and totals of weekly referrals) about here >

### Secondary Outcomes

A summary of referrals, demographics, social care history and outcomes of CPME is shown in table 1.

<Table 1 (summary of key findings) about here>

1  
2  
3 There were significantly fewer referrals made by school or early years staff in 2020 compared to  
4 other years, with only two school referrals received after lockdown. There was no increase in  
5 referrals or disclosures from other sources. In each year, several referrals were initiated when  
6 children disclosed abuse to grandparents and non-resident parents or by relatives who witnessed  
7 abuse.  
8  
9

10  
11  
12 There were significantly fewer girls referred in 2020. In total across all years, 67% of children were  
13 index cases who disclosed potential abuse, or had concerning injuries noted by others leading to  
14 referral; the remaining 33% were siblings of these index cases. Across all years 75.9% of children  
15 were known to social care at any time prior to CPME, 53% were open cases in receipt of support  
16 from social care immediately prior to CPME and 39% were currently or had previously been subject  
17 to a child protection plan (where maltreatment has been substantiated).  
18  
19  
20  
21  
22

23 The findings in 51% of all CPME were that there was evidence of non-accidental injury (NAI) or  
24 neglect, with 55% of these children having injuries, typically bruising, on more than one area of their  
25 body implying more significant NAI. In 90% of all CPME it was concluded that there were significant  
26 safeguarding concerns: even if there was not evidence to substantiate NAI, there were significantly  
27 fewer children in this category in 2018, but the reasons for this are unclear. There was no other  
28 statistical evidence of differences in demographics, social care histories, referral sources and  
29 outcomes; further details are shown in on-line supplementary table 2.  
30  
31  
32  
33  
34  
35

## 36 Discussion

### 37 Statement of principal findings

38  
39  
40 This study found a significant drop of 39% (95%CI 14-57%) in CPME referrals during 2020 compared  
41 to previous years. This drop coincides with the near total absence of referrals made by schools after  
42 school closure in March, with no recovery in school referrals after schools partially re-opened in  
43 June. Referrals from other sources did not increase in 2020, showing that other agencies did not fully  
44 compensate for school closure. The children referred for CPME in 2020 had similar social care  
45 histories to other years with the majority being previously known to social care and approximately  
46 half being open cases at the time of referral. In all years, the vast majority of CPME reports  
47 concluded that there were significant safeguarding concerns relating to physical abuse, domestic  
48 violence, emotional abuse or neglect.  
49  
50  
51  
52  
53  
54  
55  
56  
57  
58  
59  
60

1  
2  
3 Our trust is the largest provider of community paediatric services in England, managing all requests  
4 for outpatient CPME for Birmingham residents. The extended hours offered during lockdown meant  
5 that we could include children with minor injuries needing CPME who ordinarily would be managed  
6 by acute hospital trusts, so our findings may actually be an under-estimation of the decreased  
7 referral rate. Our findings should be generalisable outside of Birmingham, as this is a large multi-  
8 cultural city with above average levels of social deprivation and is the largest Local Authority in  
9 Europe.

### 10 Strengths and weaknesses in relation to other studies, discussing important differences in results

11 Although the drop in CPME referrals has been noted elsewhere in the UK (12), the longer duration of  
12 our study enabled us to examine any effects of the partial re-opening of schools. Our detailed  
13 analysis of referral details and outcomes identified the change in referral patterns this year, which is  
14 a novel finding. As our CPME service covers a fixed population, we can be certain that changes in  
15 referral patterns are genuine, unlike tertiary paediatric centres whose referrals are determined by  
16 clinical need not home address (11).

### 17 Meaning of the study: possible explanations and implications for clinicians and policymakers

18 Our findings further evidence the hidden harm to children from covid-19. The significant decrease in  
19 CPME referrals is likely largely a result of school closure and the partial re-opening of schools has not  
20 altered this trend. Attending school provides children and young people with access to a trusted  
21 adult and a safe space outside of the family home. Removing this provision increases the potential  
22 risk of abuse going unseen. Many schools have made strenuous efforts to maintain contact through  
23 remote methods, but these are not always private and it is not known who else may be in the room.  
24 Although UK government guidance was for vulnerable children, identified as those with an allocated  
25 social worker, to continue attending school, less than 10% did so (10). Nearly half of those referred  
26 for CPME were not in this category so had no protection. Disclosures to school staff by older children  
27 also protects younger siblings from abuse. Missed sentinel NAI such as bruising, may lead to children  
28 subsequently presenting with serious injuries (14) (15). These sentinel NAI are typical of community  
29 CPME referrals and the drop in referral rate therefore represents a much greater risk of harm. While  
30 UK government policy is for mandatory school attendance from September, it is vital that this is  
31 encouraged and enforced by schools given that currently less than 40% of eligible primary school  
32 pupils are attending (10). Low attendance rates may enable abusing parents to keep their children at  
33 home with few questions asked: there must be robust face to face welfare checks for those who do

1  
2  
3 not attend. Once back at school, many children may disclose abuse that occurred during closure,  
4 and children's services may struggle to meet demand. As months will have passed since the abuse,  
5 there may be little physical evidence to support allegations, in turn reducing the weight of  
6 corroborative evidence to support child protection measures and risking children feeling they are  
7 not believed. Child abuse carries long-term risks for cumulative physical and mental health  
8 problems(16,17), and without intervention a cycle of intergenerational poor parenting and abuse  
9 may result(18). There were 30 fewer CPME referrals than expected during 2020: given that  
10 Birmingham accounts for 2% of children referred for social care assessment nationally (1) we  
11 estimate that there are approximately 1500 (95%CI 538-2192) potentially abused or neglected  
12 children in England who remain hidden from services. This number may be considerably greater with  
13 the suspected rise in rates of child abuse during lockdown. We face an epidemic of unreported,  
14 unrecognised child abuse with long-term implications for society as a whole. Getting all children  
15 back into school will reduce the risk, but may not undo the harm that has already occurred. Should  
16 there be a further lockdown, safeguards must be put in place to prevent vulnerable children coming  
17 to harm.

#### 28 29 Unanswered questions and future research

30  
31 We need to continue to evaluate CPME referral patterns and outcomes as children return to school,  
32 to help understand the hidden harms from covid-19. There should be robust analyses of inpatient  
33 NAI cases to determine any increase in severe injuries. Research should include hearing children's  
34 lived experiences so that appropriate safeguards can be put in place should schools have to close in  
35 future. Longer-term research is needed to ascertain and treat the mental health and behavioural  
36 outcomes that may result from abuse during school closures. As 'child safeguarding is everyone's  
37 business'(19) learning how to protect children during an event such as covid-19 should be a multi-  
38 agency process, and perhaps the National Safeguarding Children's Panel should take this forward.

39  
40  
41 **Data sharing statement:** Data is drawn from clinical child protection reports of individual children  
42 and cannot be shared. The disaggregated and anonymised abstraction files may be shared at  
43 reasonable request from the first author.

44  
45  
46 **Author Contributions:** JG conceived the idea, the protocol was designed by JG, GD, JT, JA, and IA.  
47 The data extraction tool was piloted, revised then used for data extraction by JG, GD,HC, JA, IA, ET,  
48 EET, CM, and EB. The data analysis was undertaken by JG, NH and MP. Drafts of the paper were  
49 written by JG, GD, NH and JT with all authors contributing. Information for the paper came from the  
50 clinical records for each child. JG is guarantor of the article.

1  
2  
3 **Word Count: 2662**  
4  
5  
6  
7  
8  
9  
10  
11  
12  
13  
14  
15  
16  
17  
18  
19  
20  
21  
22  
23  
24  
25  
26  
27  
28  
29  
30  
31  
32  
33  
34  
35  
36  
37  
38  
39  
40  
41  
42  
43  
44  
45  
46  
47  
48  
49  
50  
51  
52  
53  
54  
55  
56  
57  
58  
59  
60

For peer review only

## References

1. Department for Education. Characteristics of children in need: 2018 to 2019 [Internet]. 2019 [cited 2020 Jun 23]. Available from: [https://assets.publishing.service.gov.uk/government/uploads/system/uploads/attachment\\_data/file/843046/Characteristics\\_of\\_children\\_in\\_need\\_2018\\_to\\_2019\\_main\\_text.pdf](https://assets.publishing.service.gov.uk/government/uploads/system/uploads/attachment_data/file/843046/Characteristics_of_children_in_need_2018_to_2019_main_text.pdf)
2. Barlow, J.; Woodman, J.; Bach-Mortensen, A.; Fang, Z.; Homonchuk, O. The impact of the COVID-19 pandemic on services from pregnancy through age 5 years for families who are high risk or have complex social needs. NIHR Policy Research Unit Children and Families; 2020.
3. legislation.gov.uk. Children Act 1989 c.41 Part 5 Section 47 [Internet]. UK Public General Acts; 1989 [cited 2020 Jun 18]. Available from: [http://www.legislation.gov.uk/ukpga/1989/41/section/47#:~:text=47%20Local%20authority's%20duty%20to%20investigate.&text=\(2\)Where%20a%20local%20authority,or%20promote%20the%20child's%20welfare.](http://www.legislation.gov.uk/ukpga/1989/41/section/47#:~:text=47%20Local%20authority's%20duty%20to%20investigate.&text=(2)Where%20a%20local%20authority,or%20promote%20the%20child's%20welfare.)
4. Royal College of Nursing. Safeguarding Children and Young People: Roles and Competencies for Healthcare Staff. Intercollegiate Document [Internet]. 2019 [cited 2020 Jun 18]. Available from: <https://www.portsmouthscp.org.uk/wp-content/uploads/2019/02/Intercollegiate-Doc-2019.pdf>
5. Royal College of Paediatrics and Child Health. Child Protection Companion (Chapter Five). London: RCPCH; 2020.
6. Thomas, A., Mott, A. Child protection peer review for doctors who safeguard children. Royal College of Paediatrics and Child Health; 2009.
7. Birmingham City Council. Population and census [Internet]. 2018 [cited 2020 Jun 21]. Available from: [https://www.birmingham.gov.uk/info/20057/about\\_birmingham/1294/population\\_and\\_census/2](https://www.birmingham.gov.uk/info/20057/about_birmingham/1294/population_and_census/2)
8. Birmingham Children Safeguarding Partnership. Annual Report 2018-2019 [Internet]. BCSP; 2019. Available from: <http://www.lscpbirmingham.org.uk/recent-publications/bscb-annual-report-2018-19?highlight=WyJhbm51YWwiLCJyZXBvcnQiLCJhbm51YWwgcmVwb3J0Ii0=>
9. Crawley E, Loades M, Feder G, Logan S, Redwood S, Macleod J. Wider collateral damage to children in the UK because of the social distancing measures designed to reduce the impact of COVID-19 in adults. *bmjpo*. 2020 May;4(1):e000701.
10. Department for Education. Attendance in education and early years settings during the coronavirus outbreak - GOV.UK [Internet]. 2020 [cited 2020 Jun 21]. Available from: <https://www.gov.uk/government/publications/coronavirus-covid-19-attendance-in-education-and-early-years-settings>
11. Sidpra J, Abomeli D, Hameed B, Baker J, Mankad K. Rise in the incidence of abusive head trauma during the COVID-19 pandemic. *Arch Dis Child*. 2020 Jun 30;archdischild-2020-319872.
12. Bhopal S, Buckland A, McCrone R, Villis AI, Owens S. Who has been missed? Dramatic decrease in numbers of children seen for child protection assessments during the pandemic. *Archives of*

- 1  
2  
3 Disease in Childhood [Internet]. 2020 Jun 18 [cited 2020 Jun 20]; Available from:  
4 <https://adc.bmj.com/content/early/2020/06/17/archdischild-2020-319783>  
5  
6  
7 13. The PLOS Medicine Editors. Observational Studies: Getting Clear about Transparency  
8 [Internet]. 2014 [cited 2020 Jun 22]. Available from:  
9 <https://journals.plos.org/plosmedicine/article?id=10.1371/journal.pmed.1001711>  
10  
11 14. Peter Sidebotham\*, Marian Brandon\*\*, Sue Bailey\*\*, Pippa Belderson\*\*, Jane Dodsworth\*\*,  
12 Jo Garstang\*, Elizabeth Harrison\*, Ameeta Retzer\* and Penny Sorensen\*. Pathways to harm,  
13 pathways to prevention: a triennial analysis of serious case reviews 2011-14 [Internet]. [cited  
14 2020 Jul 3]. Available from:  
15 [https://assets.publishing.service.gov.uk/government/uploads/system/uploads/attachment\\_da](https://assets.publishing.service.gov.uk/government/uploads/system/uploads/attachment_data/file/533826/Triennial_Analysis_of_SCRs_2011-2014_-_Pathways_to_harm_and_protection.pdf)  
16 [ta/file/533826/Triennial\\_Analysis\\_of\\_SCRs\\_2011-2014\\_-](https://assets.publishing.service.gov.uk/government/uploads/system/uploads/attachment_data/file/533826/Triennial_Analysis_of_SCRs_2011-2014_-_Pathways_to_harm_and_protection.pdf)  
17 [\\_\\_Pathways\\_to\\_harm\\_and\\_protection.pdf](https://assets.publishing.service.gov.uk/government/uploads/system/uploads/attachment_data/file/533826/Triennial_Analysis_of_SCRs_2011-2014_-_Pathways_to_harm_and_protection.pdf)  
18  
19  
20 15. Marian Brandon, Peter Sidebotham, Pippa Belderson, Hedy Cleaver, Jonathan Dickens, Joanna  
21 Garstang, Julie Harris, Penny Sorensen and Russell Wate,. Complexity and challenge: a triennial  
22 analysis of Serious Case Reviews 2014-17 [Internet]. [cited 2020 Jul 3]. Available from:  
23 [https://assets.publishing.service.gov.uk/government/uploads/system/uploads/attachment\\_da](https://assets.publishing.service.gov.uk/government/uploads/system/uploads/attachment_data/file/869586/TRIENNIAL_SCR_REPORT_2014_to_2017.pdf)  
24 [ta/file/869586/TRIENNIAL\\_SCR\\_REPORT\\_2014\\_to\\_2017.pdf](https://assets.publishing.service.gov.uk/government/uploads/system/uploads/attachment_data/file/869586/TRIENNIAL_SCR_REPORT_2014_to_2017.pdf)  
25  
26  
27 16. Chandan JS, Keerthy D, Zemedikun DT, Okoth K, Gokhale KM, Raza K, et al. The association  
28 between exposure to childhood maltreatment and the subsequent development of functional  
29 somatic and visceral pain syndromes. *EClinicalMedicine*. 2020 Jun;100392.  
30  
31 17. Chandan JS, Thomas T, Gokhale KM, Bandyopadhyay S, Taylor J, Nirantharakumar K. The  
32 burden of mental ill health associated with childhood maltreatment in the UK, using The Health  
33 Improvement Network database: a population-based retrospective cohort study. *The Lancet*  
34 *Psychiatry*. 2019 Nov;6(11):926–34.  
35  
36 18. Widom CS, Czaja SJ, DuMont KA. Intergenerational transmission of child abuse and neglect:  
37 Real or detection bias? *Science*. 2015 Mar 27;347(6229):1480–5.  
38  
39 19. HM Government. Working Together to Safeguard Children A guide to inter-agency working to  
40 safeguard and promote the welfare of children [Internet]. Vol. 2020. 2018. Available from:  
41 [https://assets.publishing.service.gov.uk/government/uploads/system/uploads/attachment\\_da](https://assets.publishing.service.gov.uk/government/uploads/system/uploads/attachment_data/file/779401/Working_Together_to_Safeguard-Children.pdf)  
42 [ta/file/779401/Working\\_Together\\_to\\_Safeguard-Children.pdf](https://assets.publishing.service.gov.uk/government/uploads/system/uploads/attachment_data/file/779401/Working_Together_to_Safeguard-Children.pdf)  
43  
44  
45  
46  
47  
48  
49  
50  
51  
52  
53  
54  
55  
56  
57  
58  
59  
60



Table 1 Summary of key findings.

|                                                                                                   | All        | 2018      | 2019      | 2020      | p    |
|---------------------------------------------------------------------------------------------------|------------|-----------|-----------|-----------|------|
| <b>Sample N</b>                                                                                   | 200        | 78        | 75        | 47        |      |
| <b>Age in months Median (IQR)</b>                                                                 | 69 (85)    | 72.5 (76) | 70 (109)  | 55 (77)   | .598 |
| <b>Gender N Female (%)</b>                                                                        | 73 (36.5)  | 32 (41.0) | 31 (41.3) | 10 (21.3) | .046 |
| <b>School status N (%)</b>                                                                        |            |           |           |           |      |
| Pre-school                                                                                        | 85 (42.5)  | 34 (43.6) | 30 (40.0) | 21 (44.7) | .637 |
| Primary (Reception – Year 6)                                                                      | 78 (39.0)  | 32 (41.0) | 26 (34.7) | 20 (42.6) |      |
| Secondary (Year 7-11)                                                                             | 32 (16.0)  | 11 (14.1) | 16 (21.3) | 5 (10.6)  |      |
| College / 6 <sup>th</sup> form (Year 12-13)                                                       | 5 (2.5)    | 1 (1.3)   | 3 (4.0)   | 1 (2.1)   |      |
| <b>Is child an index case (vs sibling or household contact) N Yes (%)</b>                         | 134 (67)   | 46 (59.0) | 56 (74.7) | 32 (68.1) | .117 |
| <b>Source of referral (who did child disclose abuse to, or who initiated CPME referral) N (%)</b> |            |           |           |           |      |
| School or Early Years staff                                                                       | 86 (43.9)  | 36 (47.4) | 38 (52.1) | 12 (25.5) | .015 |
| Social care staff                                                                                 | 22 (11.2)  | 10 (13.2) | 3 (4.1)   | 9 (19.1)  |      |
| Police                                                                                            | 22 (11.2)  | 11 (14.5) | 7 (9.6)   | 4 (8.5)   |      |
| Family member                                                                                     | 36 (18.4)  | 9 (11.8)  | 17 (23.3) | 10 (21.3) |      |
| Medical professional                                                                              | 4 (2.0)    | 2 (2.6)   | 2 (2.7)   | 0 (0.0)   |      |
| Foster carer                                                                                      | 7 (3.6)    | 1 (1.3)   | 2 (2.7)   | 4 (8.5)   |      |
| Sibling current inpatient due to NAI                                                              | 12 (6.1)   | 6 (7.9)   | 1 (1.4)   | 5 (10.6)  |      |
| Other                                                                                             | 7 (3.6)    | 1 (1.3)   | 3 (4.1)   | 3 (6.4)   |      |
| <b>Was child known to social care prior to CPME referral? N Yes (%)</b>                           | 151 (75.9) | 58 (74.4) | 56 (75.7) | 37 (78.7) |      |
| <b>Is child an open case to social care now N Yes (%)</b>                                         | 106 (53.3) | 39 (50.0) | 38 (51.4) | 29 (61.7) | .409 |
| <b>Are there physical findings to support NAI or neglect N Yes (%)</b>                            | 98 (51.0)  | 32 (41.0) | 46 (59.0) | 27 (57.4) | .071 |
| <b>Does the report indicate significant safeguarding concerns? N Yes %</b>                        | 180 (93.8) | 69 (88.5) | 64 (95.5) | 47 (100)  | .014 |

1  
2  
3  
4  
5  
6  
7  
8  
9  
10  
11  
12  
13  
14  
15  
16  
17  
18  
19  
20  
21  
22  
23  
24  
25  
26  
27  
28  
29  
30  
31  
32  
33  
34  
35  
36  
37  
38  
39  
40  
41  
42  
43  
44  
45  
46  
47  
48  
49  
50  
51  
52  
53  
54  
55  
56  
57  
58  
59  
60

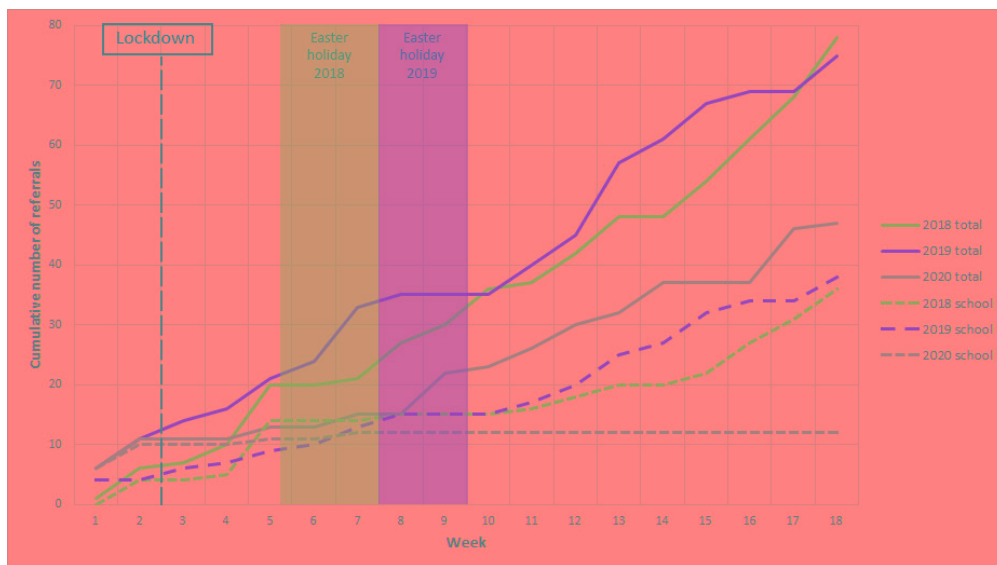

Figure 1 Cumulative number of referrals

1  
2  
3  
4  
5  
6  
7  
8  
9  
10  
11  
12  
13  
14  
15  
16  
17  
18  
19  
20  
21  
22  
23  
24  
25  
26  
27  
28  
29  
30  
31  
32  
33  
34  
35  
36  
37  
38  
39  
40  
41  
42  
43  
44  
45  
46  
47  
48  
49  
50  
51  
52  
53  
54  
55  
56  
57  
58  
59  
60

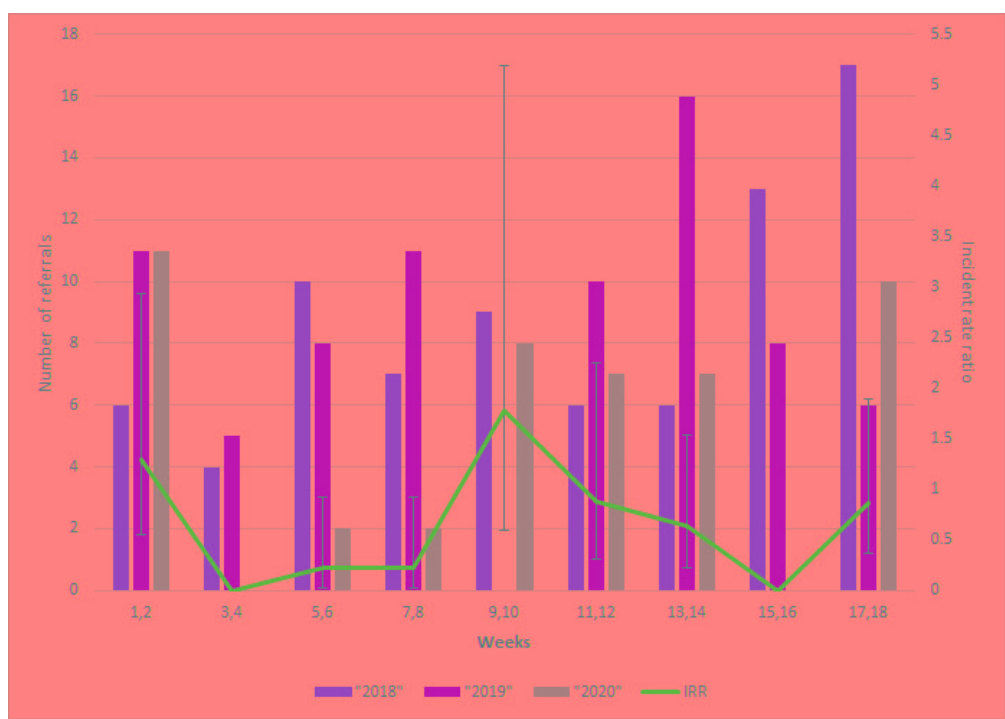

Figure 2 IRR and totals of weekly referral

244x172mm (72 x 72 DPI)

Supplementary Information Table 1 Extraction form

|                     |    |                                                                                                                    |                                                                                                                                                                |
|---------------------|----|--------------------------------------------------------------------------------------------------------------------|----------------------------------------------------------------------------------------------------------------------------------------------------------------|
| Demo-graphics       | 1  | Unique study number                                                                                                |                                                                                                                                                                |
|                     | 2  | year                                                                                                               |                                                                                                                                                                |
|                     | 3  | Week of medical                                                                                                    |                                                                                                                                                                |
|                     | 4  | Age in completed months                                                                                            |                                                                                                                                                                |
|                     | 5  | School status                                                                                                      | Less than mandatory school age/reception – year 6/ year7-11/sixth form - college                                                                               |
|                     | 6  | Special school                                                                                                     | Yes/No                                                                                                                                                         |
|                     | 7  | Sex                                                                                                                | Male/female                                                                                                                                                    |
|                     | 8  | Where does child normally live?                                                                                    | Birth parents/Special Guardian or kinship care/Foster care/Residential home or school/other                                                                    |
| Referral details    | 9  | Index case or referred as sibling/household group for CP medicals (including sibling inpatient with NAI)           | Index case/sibling or household group                                                                                                                          |
|                     | 10 | Who is the allegation against?                                                                                     | Family or household contacts/professionals                                                                                                                     |
|                     | 11 | Source of initial disclosure of potential safeguarding incident (who did child first tell OR who first saw injury) | School or Early Years staff/social care staff /police/family member/ foster carer/medical professional /sibling NAI inpatient/other please state               |
| Social care history | 12 | Was child referred to social care prior to needing this child protection medical?                                  | Yes/No                                                                                                                                                         |
|                     | 13 | If yes:<br>Current social care status at time that concerns were raised which led to this medical.                 | Investigation in progress/support from Family support worker /Child in Need/Child Protection Plan/ Child disability team/referred but NFA/other – please state |
|                     | 14 | Has child ever been on Child Protection Plan?                                                                      | Yes/No                                                                                                                                                         |
| Outcomes            | 15 | Are there any physical findings to support NAI or neglect?                                                         | Yes/No                                                                                                                                                         |
|                     | 16 | If yes:<br>Physical Findings (can choose more than one, exclude accidental injuries)                               | Bruise/Burn /Abrasion/ Scar /implement mark/ human bite mark/laceration/neglect/Other/                                                                         |
|                     | 17 | Likelihood of non-accidental injury (NAI)                                                                          | Injury consistent with NAI/ injury not consistent with NAI or no injury seen                                                                                   |
|                     | 18 | If consistent with NAI: Extent of non-accidental injuries<br>Are there NAI on more than one part of the body?      | Yes/No                                                                                                                                                         |
|                     | 19 | If consistent with NAI:<br>Are there injuries consistent with previous NAI?                                        | Yes/No                                                                                                                                                         |
|                     | 20 | Based on all the evidence in the report does the report indicate significant safeguarding concerns?                | Yes/No<br><i>If No STOP HERE</i>                                                                                                                               |

|  |    |                                                                               |                                                                                                 |
|--|----|-------------------------------------------------------------------------------|-------------------------------------------------------------------------------------------------|
|  | 21 | Are these concerns related to other factors than NAI?                         | Yes/No                                                                                          |
|  | 22 | What are the significant safeguarding concerns?<br>(can choose more than one) | Physical abuse/emotional abuse/<br>domestic violence/neglect/sexual<br>abuse/child exploitation |

For peer review only

Supplementary Table 2 Full details of demographics, referrals, social care history and outcomes.

|                                                                                                   | All        | 2018      | 2019      | 2020      | p    |
|---------------------------------------------------------------------------------------------------|------------|-----------|-----------|-----------|------|
| <b>Sample N</b>                                                                                   | 200        | 78        | 75        | 47        |      |
| <b>Age in months Median (IQR)</b>                                                                 | 69 (85)    | 72.5 (76) | 70 (109)  | 55 (77)   | .598 |
| <b>Gender N Female (%)</b>                                                                        | 73 (36.5)  | 32 (41.0) | 31 (41.3) | 10 (21.3) | .046 |
| <b>School status N (%)</b>                                                                        |            |           |           |           |      |
| Pre-school                                                                                        | 85 (42.5)  | 34 (43.6) | 30 (40.0) | 21 (44.7) |      |
| Primary (Reception – Year 6)                                                                      | 78 (39.0)  | 32 (41.0) | 26 (34.7) | 20 (42.6) |      |
| Secondary (Year 7-11)                                                                             | 32 (16.0)  | 11 (14.1) | 16 (21.3) | 5 (10.6)  |      |
| College / 6 <sup>th</sup> form (Year 12-13)                                                       | 5 (2.5)    | 1 (1.3)   | 3 (4.0)   | 1 (2.1)   | .637 |
| <b>Special school N Yes (%)</b>                                                                   | 9 (4.5)    | 5 (6.4)   | 3 (4.0)   | 1 (2.1)   | .516 |
| <b>Where child lives N (%)</b>                                                                    |            |           |           |           |      |
| Birth parents                                                                                     | 176 (88)   | 69 (88.5) | 65 (86.7) | 42 (89.4) |      |
| Special Guardianship or kinship care                                                              | 12 (6.0)   | 3 (3.8)   | 6 (8.0)   | 3 (6.4)   |      |
| Foster care                                                                                       | 7 (3.5)    | 5 (6.4)   | 2 (2.7)   | 0 (0.0)   |      |
| Residential home or school                                                                        | 3 (1.5)    | 1 (1.3)   | 2 (2.7)   | 0 (0.0)   |      |
| Other                                                                                             | 2 (1.0)    | 0 (0.0)   | 0 (0.0)   | 2 (1.0)   | .121 |
| <b>Is child an index case (vs sibling or household contact) N Yes (%)</b>                         | 134 (67)   | 46 (59.0) | 56 (74.7) | 32 (68.1) | .117 |
| <b>Allegation against N (%)</b>                                                                   |            |           |           |           |      |
| Family or household                                                                               | 189 (94.5) | 73 (93.6) | 70 (93.3) | 46 (97.9) |      |
| Professional                                                                                      | 11 (5.5)   | 5 (6.4)   | 5 (6.7)   | 1 (2.1)   | .509 |
| <b>Source of referral (who did child disclose abuse to, or who initiated CPME referral) N (%)</b> |            |           |           |           |      |
| School or Early Years staff                                                                       | 86 (43.9)  | 36 (47.4) | 38 (52.1) | 12 (25.5) |      |
| Social care staff                                                                                 | 22 (11.2)  | 10 (13.2) | 3 (4.1)   | 9 (19.1)  |      |
| Police                                                                                            | 22 (11.2)  | 11 (14.5) | 7 (9.6)   | 4 (8.5)   |      |
| Family member                                                                                     | 36 (18.4)  | 9 (11.8)  | 17 (23.3) | 10 (21.3) |      |
| Medical professional                                                                              | 4 (2.0)    | 2 (2.6)   | 2 (2.7)   | 0 (0.0)   |      |
| Foster carer                                                                                      | 7 (3.6)    | 1 (1.3)   | 2 (2.7)   | 4 (8.5)   |      |
| Sibling current inpatient due to NAI                                                              | 12 (6.1)   | 6 (7.9)   | 1 (1.4)   | 5 (10.6)  |      |
| Other                                                                                             | 7 (3.6)    | 1 (1.3)   | 3 (4.1)   | 3 (6.4)   | .015 |
| <b>Was child known to social care prior to CPME referral? N Yes (%)</b>                           | 151 (75.9) | 58 (74.4) | 56 (75.7) | 37 (78.7) | .857 |
| <b>Is child an open case to social care now N Yes (%)</b>                                         | 106 (53.3) | 39 (50.0) | 38 (51.4) | 29 (61.7) | .409 |
| <b>Has child ever been on CP plan N Yes (%)</b>                                                   | 77 (38.7)  | 26 (33.3) | 29 (39.2) | 22 (46.8) | .323 |
| <b>Are there physical findings to support NAI or neglect N Yes (%)</b>                            | 98 (51.0)  | 32 (41.0) | 46 (59.0) | 27 (57.4) | .071 |
| <b>Physical findings</b>                                                                          |            |           |           |           |      |
| Bruise                                                                                            | 128        | 21        | 25        | 21        |      |
| Burn                                                                                              | 36         | 2         | 2         | 2         |      |

|                                                                              |            |           |           |           |      |
|------------------------------------------------------------------------------|------------|-----------|-----------|-----------|------|
| Abrasion                                                                     | 29         | 7         | 10        | 7         |      |
| Scar                                                                         | 11         | 3         | 3         | 3         |      |
| Implement mark                                                               | 9          | 6         | 1         | 2         |      |
| Human bite mark                                                              | 6          | 2         | 1         | 2         |      |
| Laceration                                                                   | 5          | 1         | 2         | 2         |      |
| Neglect                                                                      | 19         | 7         | 6         | 6         |      |
| Other                                                                        | 4          | 1         | 0         | 3         |      |
| <b>Number of types of NAI Median (IQR)</b>                                   | 1 (1)      | 1 (1)     | 1 (1)     | 1.5 (1)   | .277 |
| <b>Likelihood of NAI N Consistent with NAI (%)</b>                           | 89 (46.4)  | 28 (35.9) | 35 (52.2) | 26 (55.3) | .053 |
| <b>NAI on more than one part of body N Yes (%)</b>                           | 48 (54.5)  | 16 (57.1) | 18 (52.9) | 14 (53.8) | .943 |
| <b>Are there injuries consistent with previous NAI? N Yes (%)</b>            | 15 (17.2)  | 4 (14.8)  | 4 (11.8)  | 7 (26.9)  | .282 |
| <b>Does the report indicate significant safeguarding concerns? N Yes (%)</b> | 180 (93.8) | 69 (88.5) | 64 (95.5) | 47 (100)  | .014 |
| <b>Are there concerns related to non-NAI safeguarding factors? N Yes (%)</b> | 132 (73.3) | 52 (75.4) | 47 (73.4) | 33 (70.2) | .898 |
| <b>Other safeguarding concerns</b>                                           |            |           |           |           |      |
| Physical abuse                                                               | 154        | 59        | 54        | 41        |      |
| Emotional abuse                                                              | 34         | 13        | 15        | 6         |      |
| Domestic violenc                                                             | 60         | 24        | 25        | 11        |      |
| Neglect                                                                      | 62         | 25        | 1         | 19        |      |
| Sexual abuse                                                                 | 4          | 1         | 2         | 1         |      |
| Child exploitation                                                           | 7          | 3         | 2         | 2         | .845 |

## STROBE Statement—checklist of items that should be included in reports of observational studies

|                              | Item No | Recommendation                                                                                                                                                                                                                                                                                                                                                                                                                                                         | Page No                                |
|------------------------------|---------|------------------------------------------------------------------------------------------------------------------------------------------------------------------------------------------------------------------------------------------------------------------------------------------------------------------------------------------------------------------------------------------------------------------------------------------------------------------------|----------------------------------------|
| <b>Title and abstract</b>    | 1       | (a) Indicate the study's design with a commonly used term in the title or the abstract                                                                                                                                                                                                                                                                                                                                                                                 | 3                                      |
|                              |         | (b) Provide in the abstract an informative and balanced summary of what was done and what was found                                                                                                                                                                                                                                                                                                                                                                    | 3                                      |
| <b>Introduction</b>          |         |                                                                                                                                                                                                                                                                                                                                                                                                                                                                        |                                        |
| Background/rationale         | 2       | Explain the scientific background and rationale for the investigation being reported                                                                                                                                                                                                                                                                                                                                                                                   | 4-5                                    |
| Objectives                   | 3       | State specific objectives, including any prespecified hypotheses                                                                                                                                                                                                                                                                                                                                                                                                       | 5                                      |
| <b>Methods</b>               |         |                                                                                                                                                                                                                                                                                                                                                                                                                                                                        |                                        |
| Study design                 | 4       | Present key elements of study design early in the paper                                                                                                                                                                                                                                                                                                                                                                                                                | 5                                      |
| Setting                      | 5       | Describe the setting, locations, and relevant dates, including periods of recruitment, exposure, follow-up, and data collection                                                                                                                                                                                                                                                                                                                                        | 5                                      |
| Participants                 | 6       | (a) <i>Cohort study</i> —Give the eligibility criteria, and the sources and methods of selection of participants. Describe methods of follow-up<br><i>Case-control study</i> —Give the eligibility criteria, and the sources and methods of case ascertainment and control selection. Give the rationale for the choice of cases and controls<br><i>Cross-sectional study</i> —Give the eligibility criteria, and the sources and methods of selection of participants | 5                                      |
|                              |         | (b) <i>Cohort study</i> —For matched studies, give matching criteria and number of exposed and unexposed<br><i>Case-control study</i> —For matched studies, give matching criteria and the number of controls per case                                                                                                                                                                                                                                                 |                                        |
| Variables                    | 7       | Clearly define all outcomes, exposures, predictors, potential confounders, and effect modifiers. Give diagnostic criteria, if applicable                                                                                                                                                                                                                                                                                                                               | 5-6                                    |
| Data sources/<br>measurement | 8*      | For each variable of interest, give sources of data and details of methods of assessment (measurement). Describe comparability of assessment methods if there is more than one group                                                                                                                                                                                                                                                                                   | 5<br><i>Figures 1 &amp; 2, Table 1</i> |
| Bias                         | 9       | Describe any efforts to address potential sources of bias                                                                                                                                                                                                                                                                                                                                                                                                              | 6                                      |
| Study size                   | 10      | Explain how the study size was arrived at                                                                                                                                                                                                                                                                                                                                                                                                                              | 6                                      |
| Quantitative variables       | 11      | Explain how quantitative variables were handled in the analyses. If applicable, describe which groupings were chosen and why                                                                                                                                                                                                                                                                                                                                           | 5-6                                    |
| Statistical methods          | 12      | (a) Describe all statistical methods, including those used to control for confounding                                                                                                                                                                                                                                                                                                                                                                                  | 6                                      |
|                              |         | (b) Describe any methods used to examine subgroups and interactions                                                                                                                                                                                                                                                                                                                                                                                                    | 6                                      |
|                              |         | (c) Explain how missing data were addressed                                                                                                                                                                                                                                                                                                                                                                                                                            | n/a                                    |
|                              |         | (d) <i>Cohort study</i> —If applicable, explain how loss to follow-up was addressed<br><i>Case-control study</i> —If applicable, explain how matching of cases and controls was addressed                                                                                                                                                                                                                                                                              | n/a                                    |



1  
2  
3  
4  
5  
6  
7  
8  
9  
10  
11  
12  
13  
14  
15  
16  
17  
18  
19  
20  
21  
22  
23  
24  
25  
26  
27  
28  
29  
30  
31  
32  
33  
34  
35  
36  
37  
38  
39  
40  
41  
42  
43  
44  
45  
46  
47  
48  
49  
50  
51  
52  
53  
54  
55  
56  
57  
58  
59  
60**Results**

|                  |     |                                                                                                                                                                                                                                                                                                 |                |
|------------------|-----|-------------------------------------------------------------------------------------------------------------------------------------------------------------------------------------------------------------------------------------------------------------------------------------------------|----------------|
| Participants     | 13* | (a) Report numbers of individuals at each stage of study—eg numbers potentially eligible, examined for eligibility, confirmed eligible, included in the study, completing follow-up, and analysed<br>(b) Give reasons for non-participation at each stage<br>(c) Consider use of a flow diagram | 7              |
| Descriptive data | 14* | (a) Give characteristics of study participants (eg demographic, clinical, social) and information on exposures and potential confounders                                                                                                                                                        | 8              |
|                  |     | (b) Indicate number of participants with missing data for each variable of interest                                                                                                                                                                                                             | 8              |
|                  |     | (c) <i>Cohort study</i> —Summarise follow-up time (eg, average and total amount)                                                                                                                                                                                                                | n/a            |
| Outcome data     | 15* | <i>Cohort study</i> —Report numbers of outcome events or summary measures over time                                                                                                                                                                                                             | n/a            |
|                  |     | <i>Case-control study</i> —Report numbers in each exposure category, or summary measures of exposure                                                                                                                                                                                            | n/a            |
|                  |     | <i>Cross-sectional study</i> —Report numbers of outcome events or summary measures                                                                                                                                                                                                              | 7-8<br>Table 1 |
| Main results     | 16  | (a) Give unadjusted estimates and, if applicable, confounder-adjusted estimates and their precision (eg, 95% confidence interval). Make clear which confounders were adjusted for and why they were included                                                                                    | 8-9            |
|                  |     | (b) Report category boundaries when continuous variables were categorized                                                                                                                                                                                                                       |                |
|                  |     | (c) If relevant, consider translating estimates of relative risk into absolute risk for a meaningful time period                                                                                                                                                                                |                |
| Other analyses   | 17  | Report other analyses done—eg analyses of subgroups and interactions, and sensitivity analyses                                                                                                                                                                                                  | n/a            |

**Discussion**

|                  |    |                                                                                                                                                                            |      |
|------------------|----|----------------------------------------------------------------------------------------------------------------------------------------------------------------------------|------|
| Key results      | 18 | Summarise key results with reference to study objectives                                                                                                                   | 8    |
| Limitations      | 19 | Discuss limitations of the study, taking into account sources of potential bias or imprecision. Discuss both direction and magnitude of any potential bias                 | 8-9  |
| Interpretation   | 20 | Give a cautious overall interpretation of results considering objectives, limitations, multiplicity of analyses, results from similar studies, and other relevant evidence | 9-10 |
| Generalisability | 21 | Discuss the generalisability (external validity) of the study results                                                                                                      | 9-10 |

**Other information**

|         |    |                                                                                                                                                               |     |
|---------|----|---------------------------------------------------------------------------------------------------------------------------------------------------------------|-----|
| Funding | 22 | Give the source of funding and the role of the funders for the present study and, if applicable, for the original study on which the present article is based | 12  |
|         |    | <i>Cross-sectional study</i> —If applicable, describe analytical methods taking account of sampling strategy                                                  |     |
|         |    | (e) Describe any sensitivity analyses                                                                                                                         | n/a |

# BMJ Open

## Effect of covid-19 lockdown on child protection medical assessments: a retrospective observational study in Birmingham, UK

|                                 |                                                                                                                                                                                                                                                                                                                                                                                                                                                                                                                                                                                                                                                                                                                                                                                                                                                                                                                                                                                                     |
|---------------------------------|-----------------------------------------------------------------------------------------------------------------------------------------------------------------------------------------------------------------------------------------------------------------------------------------------------------------------------------------------------------------------------------------------------------------------------------------------------------------------------------------------------------------------------------------------------------------------------------------------------------------------------------------------------------------------------------------------------------------------------------------------------------------------------------------------------------------------------------------------------------------------------------------------------------------------------------------------------------------------------------------------------|
| Journal:                        | <i>BMJ Open</i>                                                                                                                                                                                                                                                                                                                                                                                                                                                                                                                                                                                                                                                                                                                                                                                                                                                                                                                                                                                     |
| Manuscript ID                   | bmjopen-2020-042867.R1                                                                                                                                                                                                                                                                                                                                                                                                                                                                                                                                                                                                                                                                                                                                                                                                                                                                                                                                                                              |
| Article Type:                   | Original research                                                                                                                                                                                                                                                                                                                                                                                                                                                                                                                                                                                                                                                                                                                                                                                                                                                                                                                                                                                   |
| Date Submitted by the Author:   | 25-Aug-2020                                                                                                                                                                                                                                                                                                                                                                                                                                                                                                                                                                                                                                                                                                                                                                                                                                                                                                                                                                                         |
| Complete List of Authors:       | Garstang, Joanna; Birmingham Community Healthcare NHS Trust; University of Birmingham, College of Medical and Dental Sciences, Debelle, Geoff; Birmingham Children's Hospital, Paediatrics; University of Birmingham, College of Medical and Dental Sciences, Anand, Indu; Birmingham Community Healthcare NHS Trust Armstrong, Jane; Birmingham Community Healthcare NHS Trust Botcher, Emily; Birmingham Community Healthcare NHS Trust Chaplin, Helen; Birmingham Community Healthcare NHS Trust Hallett, Nutmeg; University of Birmingham , College of Medicine and Dentistry Morgans, Clare; Birmingham Community Healthcare NHS Trust Price, Malcolm; University of Birmingham , College of Medicine and Dentistry Tan, Ern Ern Henna; Birmingham Community Healthcare NHS Trust Tudor, Emily; Birmingham Community Healthcare NHS Trust Taylor, Julie; University of Birmingham, College of Medical and Dental Sciences, ; Birmingham Women's and Children's Hospital NHS Foundation Trust., |
| <b>Primary Subject Heading</b>: | Paediatrics                                                                                                                                                                                                                                                                                                                                                                                                                                                                                                                                                                                                                                                                                                                                                                                                                                                                                                                                                                                         |
| Secondary Subject Heading:      | Public health                                                                                                                                                                                                                                                                                                                                                                                                                                                                                                                                                                                                                                                                                                                                                                                                                                                                                                                                                                                       |
| Keywords:                       | Child protection < PAEDIATRICS, Community child health < PAEDIATRICS, Non-accidental injury < PAEDIATRICS                                                                                                                                                                                                                                                                                                                                                                                                                                                                                                                                                                                                                                                                                                                                                                                                                                                                                           |
|                                 |                                                                                                                                                                                                                                                                                                                                                                                                                                                                                                                                                                                                                                                                                                                                                                                                                                                                                                                                                                                                     |

SCHOLARONE™  
Manuscripts



I, the Submitting Author has the right to grant and does grant on behalf of all authors of the Work (as defined in the below author licence), an exclusive licence and/or a non-exclusive licence for contributions from authors who are: i) UK Crown employees; ii) where BMJ has agreed a CC-BY licence shall apply, and/or iii) in accordance with the terms applicable for US Federal Government officers or employees acting as part of their official duties; on a worldwide, perpetual, irrevocable, royalty-free basis to BMJ Publishing Group Ltd ("BMJ") its licensees and where the relevant Journal is co-owned by BMJ to the co-owners of the Journal, to publish the Work in this journal and any other BMJ products and to exploit all rights, as set out in our [licence](#).

The Submitting Author accepts and understands that any supply made under these terms is made by BMJ to the Submitting Author unless you are acting as an employee on behalf of your employer or a postgraduate student of an affiliated institution which is paying any applicable article publishing charge ("APC") for Open Access articles. Where the Submitting Author wishes to make the Work available on an Open Access basis (and intends to pay the relevant APC), the terms of reuse of such Open Access shall be governed by a Creative Commons licence – details of these licences and which [Creative Commons](#) licence will apply to this Work are set out in our licence referred to above.

Other than as permitted in any relevant BMJ Author's Self Archiving Policies, I confirm this Work has not been accepted for publication elsewhere, is not being considered for publication elsewhere and does not duplicate material already published. I confirm all authors consent to publication of this Work and authorise the granting of this licence.

# Effect of covid-19 lockdown on child protection medical assessments: a retrospective observational study in Birmingham, UK.

## Title page

1 Dr Joanna Garstang<sup>1,2,4\*</sup> [Joanna.garstang@nhs.net](mailto:Joanna.garstang@nhs.net) Consultant Community Paediatrician, Designated Doctor for Child Death <https://orcid.org/0000-0001-9268-0581>

2 Dr Geoff DeBelle<sup>3,4</sup> [g.debelle@nhs.net](mailto:g.debelle@nhs.net) Consultant Community and General Paediatrician, Designated Doctor for Safeguarding Children <https://orcid.org/0000-0002-0450-3129>

3 Dr Indu Anand<sup>1</sup> [indu.anand@nhs.net](mailto:indu.anand@nhs.net) Consultant Community Paediatrician, Named Doctor for Safeguarding Children

4 Dr Jane Armstrong<sup>1,4</sup> [jane.armstrong2@nhs.net](mailto:jane.armstrong2@nhs.net) Consultant Community Paediatrician, Designated Doctor for Safeguarding Children <https://orcid.org/0000-0003-0380-4162>

5 Dr Emily Botcher<sup>1</sup> [emily.botcher@nhs.net](mailto:emily.botcher@nhs.net) Speciality Trainee in Community Paediatrics <https://orcid.org/0000-0003-7059-3516>

6 Dr Helen Chaplin<sup>1,4</sup> [helenchaplin@nhs.net](mailto:helenchaplin@nhs.net) Consultant Community Paediatrician and Designated Doctor for Safeguarding Children <https://orcid.org/0000-0001-7059-3516>

7 Dr Nutmeg Hallett<sup>2</sup> [N.N.Hallett@bham.ac.uk](mailto:N.N.Hallett@bham.ac.uk) Lecturer/Research Fellow <https://orcid.org/0000-0003-3115-8831>

8 Dr Clare Morgans<sup>1</sup> [cmorgans@nhs.net](mailto:cmorgans@nhs.net) Speciality Trainee in Community Paediatrics <https://orcid.org/0000-0002-6556-8153>

9 Dr Malcolm Price<sup>2</sup> [m.price@bham.ac.uk](mailto:m.price@bham.ac.uk) Lecturer in Biostatistics <https://orcid.org/0000-0002-7352-3027>

10 Dr Ern Ern Henna Tan<sup>1</sup> [e.tan@nhs.net](mailto:e.tan@nhs.net) Speciality Trainee in Paediatrics <https://orcid.org/0000-0002-8314-512X>

11 Dr Emily Tudor<sup>1</sup> [emily.tudor@nhs.net](mailto:emily.tudor@nhs.net) Speciality Trainee in Community Paediatrics <https://orcid.org/0000-0002-0302-9883>

12 Professor Julie Taylor<sup>2,3,§</sup> [j.taylor.1@bham.ac.uk](mailto:j.taylor.1@bham.ac.uk) Professor of Child Protection <https://orcid.org/0000-0002-7259-0906>

<sup>1</sup>Birmingham Community Healthcare NHS Foundation Trust

<sup>2</sup>College of Medicine and Dentistry, University of Birmingham, Edgbaston, Birmingham, UK

<sup>3</sup>Birmingham Women's and Children's NHS Foundation Trust

<sup>4</sup>Birmingham and Solihull Clinical Commissioning Group

\*Lead Author address: Birmingham Community Healthcare NHS Trust, & University of Birmingham. Allens Croft Children's Centre, Birmingham, B14 6RP, UK

§Corresponding author address: College of Medical and Dental Science, University of Birmingham, Edgbaston, B15 2TT, UK

# Effect of covid-19 lockdown on child protection medical assessments: a retrospective observational study in Birmingham, UK.

## Abstract

### Objectives

To determine any change in referral patterns and outcomes in children (0-18) referred for child protection medical examination (CPME) during the covid-19 pandemic compared to previous years.

### Design

Retrospective observational study, analysing routinely collected clinical data from CPME reports in a rapid response to the pandemic lockdown.

### Setting

Birmingham Community Healthcare NHS Trust, which provides all routine CPME for Birmingham, England, population 1.1 million including 288,000 children.

### Participants

Children aged under 18 years attending CPME during an 18 week period from late February to late June during the years 2018, 2019, and 2020.

### Main Outcome Measures

Numbers of referrals, source of disclosure and outcomes from CPME

### Results

There were 78 CPME referrals in 2018, 75 in 2019 and 47 in 2020, this was a 39.7% (95%CI 12.4-59.0) reduction in referrals from 2018 to 2020, and a 37.3% (95%CI 8.6-57.4) reduction from 2019 to 2020.

1  
2  
3 There were fewer CPME referrals initiated by school staff in 2020, 12(26%) compared to 36 (47%)  
4 and 38 (52%) in 2018 and 2019 respectively. In all years 75.9% of children were known to social care  
5 prior to CPME, and 94% of CPME concluded that there were significant safeguarding concerns.  
6  
7  
8

## 9 Conclusions

10 School closure due to covid-19 may have harmed children as child abuse has remained hidden.  
11 There needs to be either mandatory attendance at schools in future or viable alternatives found.  
12  
13 There may be a significant increase in safeguarding referrals when schools fully re-open as children  
14 disclose the abuse they have experienced at home.  
15  
16  
17  
18

## 19 Article summary: Strengths and Limitations of the Study

- 20  
21  
22
- 23 • This is a highly robust study: we obtained CPME reports for 97% of CPME referrals during the  
24 study period.
  - 25 • We ensured consistency of data extraction by double reviewing every report, with further  
26 consensus discussions for the few cases that raised uncertainties.
  - 27 • The team extracting the data comprised highly experienced paediatricians with expertise in  
28 child abuse.
  - 29 • One weakness is that we only considered minor injuries from outpatient CPME, excluding  
30 those admitted to hospital, so our findings do not include those with more serious NAI,  
31 however they would be taken to hospital for treatment due to the severity of their injuries.  
32  
33

34 **Keywords:** child abuse; non-accidental injury; paediatrics; child protection medical examination.

35  
36  
37 **Funding statement:** The study was not funded. JG is funded by West Midlands Clinical Research  
38 Network (NIHR) as a Clinical Trials Scholar. MP is supported by the NIHR Birmingham Biomedical  
39 Research Centre at the University Hospitals Birmingham NHS Foundation Trust and the University of  
40 Birmingham. The views expressed are those of the authors and not necessarily those of the NHS, the  
41 NIHR or the Department of Health and Social Care. The University of Birmingham funded the article  
42 processing charge.  
43  
44  
45  
46

47 **Competing interest statement:** There are no competing interests to declare.  
48  
49  
50  
51  
52  
53  
54  
55  
56  
57  
58  
59  
60

## Introduction

Nearly 400,000 children in England each year are defined as 'children in need'; these are children who require additional services, including child protection, to maintain a satisfactory level of health or development(1). Since the lockdown began, there are burgeoning concerns that child protection referrals have decreased, with professionals reporting limited opportunities to make accurate assessments of children's needs(2). Legislation sets out the specific roles and responsibilities of agencies for undertaking child protection enquiries when a child or young person is referred for suspected maltreatment(3), including formal child protection medical examinations (CPME). The purpose of CPME is to provide a holistic assessment of the child's health, document any injuries and determine possible causes including the reasonable likelihood of injuries being inflicted or non-inflicted. A report is provided to inform any child protection investigations. CPMEs are performed or supervised by an experienced consultant paediatrician (4), adhering to rigorous standards in respect of consent; conduct of the examination; documentation of history; findings and formulation; photo-documentation; and report writing(5), with reports subject to regular peer review(6).

Birmingham is the second largest city in the UK, with a diverse population and is the largest local authority in Europe. It is also a relatively young city, with 23% of its population being children under the age of 16 years(7). The proportion of children subject to a child protection plan is higher than for the UK as a whole(8) and thirty-five percent of children live in poverty(8). In Birmingham CPMEs are generally undertaken within a community setting during working hours, often for children who have disclosed maltreatment to school or nursery staff, who then refer them to Birmingham Children's Trust (social care). Children with suspected sexual abuse are assessed separately, within specialised, regional child sexual assault referral centres. Hospital-based paediatricians perform CPMEs for those children with more significant injuries requiring treatment and for out-of-hours referrals. During the covid-19 lockdown the community based CPME service provided extended hours (6 April to 23 May 2020) that covered evenings and weekends to minimise hospital attendance so an increase in referrals for CPME was expected.

Schools are at the frontline of child safeguarding; educational staff are often the first to report potential child abuse. This raises concerns that vulnerable children are now invisible to professionals and potentially 'at risk' in homes where families face even greater hardships(8). Such 'collateral damage'(9) has been borne out by evidence that only 10% of children on a child protection plan or 'in-need' were attending schools that were remaining open specifically for their benefit and even where schools are open for selected year groups, attendance remains very low (10).

1  
2  
3 Although there has been much professional concern about the potential risk children have faced at  
4 home there have been limited data, with one report of an increase in abusive head trauma noted in  
5 London (11) and a short report from the North-East of England noting a dramatic decrease in CPME  
6 referrals (12). This current study was designed as a rapid response to fill gaps in knowledge about  
7 child protection referrals during the covid-19 pandemic.  
8  
9

10  
11  
12 The aim was to determine differences in the number and outcomes of child protection referrals for  
13 CPME in Birmingham during the covid-19 pandemic lockdown (March to June 2020) compared with  
14 the same periods in 2018 and 2019. Our research questions were:  
15  
16

17  
18 What is the difference in child protection referrals during the covid-19 pandemic compared to  
19 previous years?  
20

21  
22 Are there differences in demographic details, referral source and outcomes for children presenting  
23 for child protection medical examination during the covid-19 pandemic compared to previous years?  
24  
25

## 26 27 Methods

### 28 29 Study design

30  
31 Retrospective observational study of referrals for CPME. It adhered to STROBE guidance (13).  
32  
33

### 34 35 Setting and sample

36  
37 All children aged 0-18 attending for CPME at Birmingham Community Healthcare Trust (BCHT),  
38 England. BCHT provides specialist CPME for the population of Birmingham, total population 1.1  
39 million of which 288,000 are children aged <18 (7). Data were collected for all CPME for 18-week  
40 periods in 2018, 2019 and 2020, from the last week in February, when schools returned following  
41 the half-term holiday, to the end of June and noting the variation mid-2020 when extended hours  
42 were running.  
43  
44  
45  
46  
47

### 48 49 Procedure

50  
51 We obtained a list of all children referred for CPME from the booking service, which is the single  
52 point of contact for all CPME referrals in BCHT, and accessed the electronic patient records (EPR) for  
53 these children, obtaining copies of reports from CPME. We read the reports, and completed an  
54 anonymised data extraction form for each CPME (on-line supplementary table 1). The data collection  
55 form was in three parts: i) child demographic data, including age, gender, school age group (pre-  
56 school, primary, secondary, post-16), in a special school or not, ii) referral details including whether  
57  
58  
59  
60



1  
2  
3 an index case or referred as a sibling group, source of initial disclosure, who the allegation was  
4 against, whether the child had previous referral to social care and if so, the current social care  
5 status, and whether the child had ever been on a child protection plan, and iii) outcomes of the  
6 CPME including whether there were physical findings to support non-accidental injury (NAI) or  
7 neglect, and, if so, what were the physical findings; likelihood of NAI; whether NAIs were present on  
8 more than one body part; were their injuries consistent with previous NAI; whether the report  
9 indicated significant safeguarding concerns; if the concerns were related to factors other than NAI;  
10 and, if so, what?  
11  
12

13  
14  
15  
16  
17 Outcomes were taken either directly from the conclusion of the CPME report, or if the conclusion  
18 was unclear, were determined based on the description of injuries and events within the report. If  
19 the CPME was not available, we used the EPR for demographics, referral source and safeguarding  
20 history, omitting data on outcomes of CPME.  
21  
22

23  
24  
25 Prior to commencing data extraction, all the clinicians reviewed 10 anonymised CPME reports which  
26 were then reviewed and discussed by the whole group. This enabled any differences in  
27 interpretation of CPME to be resolved and ensured quality and consistency of data extraction.  
28  
29

30  
31 Clinicians worked in pairs, consisting of a specialist consultant in child protection (either Named or  
32 Designated Doctors for Safeguarding) and a specialist trainee in paediatrics, all of whom have a  
33 minimum of four years postgraduate medical training in child health. Each case had data extracted  
34 independently by the consultant and trainee, to ensure consistency. In the event of disagreement  
35 the case was reviewed by another consultant.  
36  
37  
38  
39

## 40 Study size

41  
42 All assessments were included. The time period included the last week in February which was before  
43 there was significant concern in schools about covid-19. Data collection continued for the month of  
44 June to enable any change in referral CPME patterns with the partial reopening of some primary  
45 schools.  
46  
47  
48  
49

## 50 Statistical analysis

51  
52 Anonymised data were entered into SPSS. Cases were analysed by the year of referral. If children  
53 had more than one CPME during the study period, each CPME was considered as a separate case.  
54 Referral rates between years for the whole 18-week period were compared using incidence rate  
55 ratios (IRR). IRRs for two weekly time-periods comparing 2018/19 with 2020 were also calculated  
56 and plotted on a graph with 95% confidence intervals. To compare differences in variables between  
57  
58  
59  
60

1  
2  
3 the years, Kruskal-Wallis tests were run for continuous variables (age, number of types of injuries)  
4 and chi-square tests were run for categorical variables.  
5  
6

## 7 8 Ethics

9  
10 This study involved clinicians analysing routinely collected patient data, from patients within their  
11 own clinical service, it therefore does not require HRA ethical approval. The study was approved by  
12 the Research and Innovation Department in Birmingham Community Healthcare Trust.  
13  
14  
15

## 16 Patient and public involvement

17  
18 As a rapid observational study using retrospective records we were unable to include children who  
19 had been through a CPME or their parents in the study. However we have a Children and Young  
20 People's Advisory Group whom we intend to involve in the dissemination and guidelines for  
21 practitioners.  
22  
23  
24  
25

## 26 Results

27  
28  
29 There were 200 CPMEs during the study period; 193 had CPME reports available with complete  
30 information from 191.  
31  
32  
33

## 34 Referral numbers

35  
36 There were fewer CPME referrals in 2020 compared to previous years, as shown in figure 1, with 78  
37 in 2018, 75 in 2019 and 47 in 2020. There was a 39.7% (95%CI 12.4-59.0) reduction in referrals from  
38 2018 to 2020, and a 37.3% (95%CI 8.6-57.4) reduction from 2019 to 2020. The IRR for 2020  
39 compared to 2018/19 was 0.61 (95%CI 0.43-0.86) showing an overall reduction of 39% (95% CI 14%-  
40 57%).  
41  
42  
43  
44

45 < Figure 1 (Cumulative number of referral) about here >  
46  
47

48 The two weekly data shows that there was a significant drop in referrals for a 6-week period from  
49 weeks 3/4 to weeks 7/8, see figure 2. There was some evidence of an increase in referrals during  
50 weeks 9/10 in 2020 after which referral rates were broadly similar, with all confidence intervals  
51 crossing 1, apart from weeks 15/16 when there were no referrals in 2020.  
52  
53  
54

55 < Figure 2 (IRR and totals of weekly referrals) about here >  
56  
57  
58  
59  
60

## Secondary Outcomes

A summary of referrals, demographics, social care history and outcomes of CPME is shown in table 1.

Table 1. Summary of key findings

| Variables<br>n=                                                                          | All<br>200 | 2018<br>78 | 2019<br>75 | 2020<br>47 | <i>p</i> |
|------------------------------------------------------------------------------------------|------------|------------|------------|------------|----------|
| Age in months <i>Median (IQR)</i>                                                        | 69 (85)    | 72.5 (76)  | 70 (109)   | 55 (77)    | .598     |
| Gender <i>Female (%)</i>                                                                 | 73 (36.5)  | 32 (41.0)  | 31 (41.3)  | 10 (21.3)  | .046     |
| School status (%)                                                                        |            |            |            |            |          |
| Pre-school                                                                               | 85 (42.5)  | 34 (43.6)  | 30 (40.0)  | 21 (44.7)  | .637     |
| Primary (Reception – Year 6)                                                             | 78 (39.0)  | 32 (41.0)  | 26 (34.7)  | 20 (42.6)  |          |
| Secondary (Year 7-11)                                                                    | 32 (16.0)  | 11 (14.1)  | 16 (21.3)  | 5 (10.6)   |          |
| College / 6 <sup>th</sup> form (Year 12-13)                                              | 5 (2.5)    | 1 (1.3)    | 3 (4.0)    | 1 (2.1)    |          |
| Is child an index case (vs sibling or household contact) <i>Yes (%)</i>                  | 134 (67)   | 46 (59.0)  | 56 (74.7)  | 32 (68.1)  | .117     |
| Source of referral (who did child disclose abuse to, or who initiated CPME referral) (%) |            |            |            |            |          |
| School or Early Years staff                                                              | 86 (43.9)  | 36 (47.4)  | 38 (52.1)  | 12 (25.5)  | .015     |
| Social care staff                                                                        | 22 (11.2)  | 10 (13.2)  | 3 (4.1)    | 9 (19.1)   |          |
| Police                                                                                   | 22 (11.2)  | 11 (14.5)  | 7 (9.6)    | 4 (8.5)    |          |
| Family member                                                                            | 36 (18.4)  | 9 (11.8)   | 17 (23.3)  | 10 (21.3)  |          |
| Medical professional                                                                     | 4 (2.0)    | 2 (2.6)    | 2 (2.7)    | 0 (0.0)    |          |
| Foster carer                                                                             | 7 (3.6)    | 1 (1.3)    | 2 (2.7)    | 4 (8.5)    |          |
| Sibling current inpatient due to NAI                                                     | 12 (6.1)   | 6 (7.9)    | 1 (1.4)    | 5 (10.6)   |          |
| Other                                                                                    | 7 (3.6)    | 1 (1.3)    | 3 (4.1)    | 3 (6.4)    |          |
| Was child known to social care prior to CPME referral? <i>Yes (%)</i>                    | 151 (75.9) | 58 (74.4)  | 56 (75.7)  | 37 (78.7)  | .857     |
| Is child an open case to social care now <i>Yes (%)</i>                                  | 106 (53.3) | 39 (50.0)  | 38 (51.4)  | 29 (61.7)  | .409     |
| Are there physical findings to support NAI or neglect <i>Yes (%)</i>                     | 98 (51.0)  | 32 (41.0)  | 46 (59.0)  | 27 (57.4)  | .071     |
| Does the report indicate significant safeguarding concerns? <i>Yes %</i>                 | 180 (93.8) | 69 (88.5)  | 64 (95.5)  | 47 (100)   | .014     |

1  
2  
3 There were significantly fewer referrals made by school or early years staff in 2020 compared to  
4 other years, with only two school referrals received after lockdown. There was no increase in  
5 referrals or disclosures from other sources. In each year, several referrals were initiated when  
6 children disclosed abuse to grandparents and non-resident parents or by relatives who witnessed  
7 abuse.  
8  
9

10  
11  
12 There were significantly fewer girls referred in 2020. In total across all years, 67% of children were  
13 index cases who disclosed potential abuse, or had concerning injuries noted by others leading to  
14 referral; the remaining 33% were siblings of these index cases. Across all years 75.9% of children  
15 were known to social care at any time prior to CPME, 53% were open cases in receipt of support  
16 from social care immediately prior to CPME and 39% were currently or had previously been subject  
17 to a child protection plan (where maltreatment has been substantiated).  
18  
19  
20  
21  
22

23 The findings in 51% of all CPME were that there was evidence of non-accidental injury (NAI) or  
24 neglect, with 55% of these children having injuries, typically bruising, on more than one area of their  
25 body implying more significant NAI. In 90% of all CPME it was concluded that there were significant  
26 safeguarding concerns: even if there was not evidence to substantiate NAI, there were significantly  
27 fewer children in this category in 2018, but the reasons for this are unclear. There was no other  
28 statistical evidence of differences in demographics, social care histories, referral sources and  
29 outcomes; further details are shown in on-line supplementary table 2.  
30  
31  
32  
33  
34  
35

## 36 Discussion

### 37 Statement of principal findings

38  
39  
40 This study found a significant drop of 39% (95%CI 14-57%) in CPME referrals during 2020 compared  
41 to previous years with 78 referrals in 2018, 75 in 2019 and 47 in 2020. This drop coincides with the  
42 near total absence of referrals made by schools after school closure in March, with no recovery in  
43 school referrals after schools partially re-opened in June. Referrals from other sources did not  
44 increase in 2020, showing that other agencies did not fully compensate for school closure. The  
45 children referred for CPME in 2020 had similar social care histories to other years with the majority  
46 being previously known to social care and approximately half being open cases at the time of  
47 referral. In all years, the vast majority of CPME reports concluded that there were significant  
48 safeguarding concerns relating to physical abuse, domestic violence, emotional abuse or neglect.  
49  
50  
51  
52  
53  
54  
55  
56  
57  
58  
59  
60

1  
2  
3 Our trust is the largest provider of community paediatric services in England, managing all requests  
4 for outpatient CPME for Birmingham residents. The extended hours offered during lockdown meant  
5 that we could include children with minor injuries needing CPME who ordinarily would be managed  
6 by acute hospital trusts, so our findings may actually be an under-estimation of the decreased  
7 referral rate. Our findings should be generalisable outside of Birmingham, as this is a large multi-  
8 cultural city with above average levels of social deprivation and is the largest Local Authority in  
9 Europe.

#### 10 Strengths and weaknesses in relation to other studies, discussing important differences in results

11 Although the drop in CPME referrals has been noted elsewhere in the UK (12), the longer duration of  
12 our study enabled us to examine any effects of the partial re-opening of schools. Our detailed  
13 analysis of referral details and outcomes identified the change in referral patterns this year, which is  
14 a novel finding. As our CPME service covers a fixed population, we can expect that changes in  
15 referral patterns are genuine, unlike tertiary paediatric centres whose referrals are determined by  
16 clinical need not home address (11).

#### 17 Meaning of the study: possible explanations and implications for clinicians and policymakers

18 Our findings further evidence the hidden harm to children from covid-19. The significant decrease in  
19 CPME referrals is likely largely a result of school closure and the partial re-opening of schools has not  
20 altered this trend. Attending school provides children and young people with access to a trusted  
21 adult and a safe space outside of the family home. Removing this provision increases the potential  
22 risk of abuse going unseen. Many schools have made strenuous efforts to maintain contact through  
23 remote methods, but these are not always private and it is not known who else may be in the room.

24 Although UK government guidance was for vulnerable children, identified as those with an allocated  
25 social worker, to continue attending school, less than 10% did so (10). Nearly half of those referred  
26 for CPME were not in this category so had no protection. Disclosures to school staff by older children  
27 also protects younger siblings from abuse and neglect. It is concerning that 39% of children referred  
28 for CPME were either currently or previously subject to CPP, this suggests even if there is a lower  
29 threshold for subsequent referral that CPPs are not providing adequate safeguards for vulnerable  
30 children. Missed sentinel NAI such as bruising, may lead to children subsequently presenting with  
31 serious injuries (14) (15). These sentinel NAI are typical of community CPME referrals and the drop

1  
2  
3 in referral rate therefore represents a much greater risk of harm. While UK government policy is for  
4 mandatory school attendance to begin in September 2020, it is unclear at the timing of writing how  
5 this will be implemented. It is vital that this is encouraged and enforced by schools given that  
6 currently less than 40% of eligible primary school pupils are attending (10). Low attendance rates  
7 may enable abusing parents to keep their children at home with few questions asked: there must be  
8 robust face to face welfare checks for those who do not attend.  
9  
10  
11  
12  
13  
14  
15

16 Once back at school, many children may disclose abuse that occurred during closure, and children's  
17 services may struggle to meet demand. As months will have passed since the abuse, there may be  
18 little physical evidence to support allegations, in turn reducing the weight of corroborative evidence  
19 to support child protection measures and risking children feeling they are not believed.  
20  
21  
22  
23  
24  
25

26 Child abuse and neglect carries long-term risks for cumulative physical and mental health  
27 problems(16,17), and without intervention a cycle of intergenerational poor parenting, abuse and  
28 neglect may result(18). There were 30 fewer CPME referrals than expected during 2020: given that  
29 Birmingham accounts for 2% of children referred for social care assessment nationally (1) we  
30 estimate that there are approximately 1500 (95%CI 538-2192) potentially abused or neglected  
31 children in England who remain hidden from services. This number may be considerably greater with  
32 the suspected rise in rates of child abuse during lockdown. We face an epidemic of unreported,  
33 unrecognised child abuse and neglect with long-term implications for society as a whole. Getting all  
34 children back into school will reduce the risk, but may not undo the harm that has already occurred.  
35 Should there be a further lockdown, safeguards must be put in place to prevent vulnerable children  
36 coming to harm.  
37  
38  
39  
40  
41  
42  
43  
44

#### 45 Unanswered questions and future research

46  
47 We need to continue to evaluate CPME referral patterns and outcomes as children return to school,  
48 to help understand the hidden harms from covid-19. There should be robust analyses of inpatient  
49 NAI cases to determine any increase in severe injuries. It is disappointing that these data need to be  
50 studied in local areas, some of which have very small numbers. A national data and analytics system  
51 would be very helpful. The significant decrease noted in girl referrals may simply be due to small  
52 numbers, but warrants further investigation as to whether this trend continues and if so, why.  
53 Research should include hearing children's lived experiences so that appropriate safeguards can be  
54 put in place should schools have to close in future. Longer-term research is needed to ascertain and  
55  
56  
57  
58  
59  
60

1  
2  
3 treat the mental health and behavioural outcomes that may result from abuse and neglect during  
4 school closures. As 'child safeguarding is everyone's business'(19) learning how to protect children  
5 during an event such as covid-19 should be a multi-agency process. If there are further school  
6 closures the relative importance of hospital doctors, social workers and family members increases.  
7  
8 Media communications could be used with effect to highlight this in hospital emergency  
9 departments for example. Mandatory regular visits to vulnerable children could be considered.  
10  
11 Perhaps the National Safeguarding Practice Review Panel could take these ideas forward.  
12  
13  
14

15  
16 **Data sharing statement:** Data is drawn from clinical child protection reports of individual children  
17 and cannot be shared. The disaggregated and anonymised abstraction files may be shared at  
18 reasonable request from the first author.  
19  
20

21 **Author Contributions:** JG conceived the idea, the protocol was designed by JG, GD, JT, JA, and IA.  
22 The data extraction tool was piloted, revised then used for data extraction by JG, GD,HC, JA, IA, ET,  
23 EET, CM, and EB. The data analysis was undertaken by JG, NH and MP. Drafts of the paper were  
24 written by JG, GD, NH and JT with all authors contributing. Information for the paper came from the  
25 clinical records for each child. JG is guarantor of the article.  
26  
27  
28  
29

30 **Word Count: 2975**  
31  
32  
33  
34  
35  
36  
37  
38  
39  
40  
41  
42  
43  
44  
45  
46  
47  
48  
49  
50  
51  
52  
53  
54  
55  
56  
57  
58  
59  
60

## References

1. Department for Education. Characteristics of children in need: 2018 to 2019 [Internet]. 2019 [cited 2020 Jun 23]. Available from: [https://assets.publishing.service.gov.uk/government/uploads/system/uploads/attachment\\_data/file/843046/Characteristics\\_of\\_children\\_in\\_need\\_2018\\_to\\_2019\\_main\\_text.pdf](https://assets.publishing.service.gov.uk/government/uploads/system/uploads/attachment_data/file/843046/Characteristics_of_children_in_need_2018_to_2019_main_text.pdf)
2. Barlow J, Woodman J, Bach-Mortensen A, Fang Z, Homonchuk O. The impact of the COVID-19 pandemic on services from pregnancy through age 5 years for families who are high risk or have complex social needs. NIHR Policy Research Unit Children and Families; 2020.
3. legislation.gov.uk. Children Act 1989 c.41 Part 5 Section 47 [Internet]. UK Public General Acts; 1989 [cited 2020 Jun 18]. Available from: [http://www.legislation.gov.uk/ukpga/1989/41/section/47#:~:text=47%20Local%20authority's%20duty%20to%20investigate.&text=\(2\)Where%20a%20local%20authority,or%20promote%20the%20child's%20welfare.](http://www.legislation.gov.uk/ukpga/1989/41/section/47#:~:text=47%20Local%20authority's%20duty%20to%20investigate.&text=(2)Where%20a%20local%20authority,or%20promote%20the%20child's%20welfare.)
4. Royal College of Nursing. Safeguarding Children and Young People: Roles and Competencies for Healthcare Staff. Intercollegiate Document [Internet]. 2019 [cited 2020 Jun 18]. Available from: <https://www.portsmouthscp.org.uk/wp-content/uploads/2019/02/Intercollegiate-Doc-2019.pdf>
5. Royal College of Paediatrics and Child Health. Child Protection Companion (Chapter Five). London: RCPCH; 2020.
6. Thomas A, Mott A. Child protection peer review for doctors who safeguard children. Royal College of Paediatrics and Child Health; 2009. Available from: <https://www.rcpch.ac.uk/resources/peer-review-safeguarding>
7. Birmingham City Council. Population and census [Internet]. 2018 [cited 2020 Jun 21]. Available from: [https://www.birmingham.gov.uk/info/20057/about\\_birmingham/1294/population\\_and\\_census/2](https://www.birmingham.gov.uk/info/20057/about_birmingham/1294/population_and_census/2)
8. Birmingham Children Safeguarding Partnership. Annual Report 2018-2019 [Internet]. BCSP; 2019. Available from: <http://www.lscpbirmingham.org.uk/recent-publications/bscb-annual-report-2018-19?highlight=WyJhbm51YWwiLCJyZXBvcnQiLCJhbm51YWwgcmVwb3J0II0=>
9. Crawley E, Loades M, Feder G, Logan S, Redwood S, Macleod J. Wider collateral damage to children in the UK because of the social distancing measures designed to reduce the impact of COVID-19 in adults. *bmjpo*. 2020 May;4(1):e000701.
10. Department for Education. Attendance in education and early years settings during the coronavirus outbreak - GOV.UK [Internet]. 2020 [cited 2020 Jun 21]. Available from: <https://www.gov.uk/government/publications/coronavirus-covid-19-attendance-in-education-and-early-years-settings>
11. Sidpra J, Abomeli D, Hameed B, Baker J, Mankad K. Rise in the incidence of abusive head trauma during the COVID-19 pandemic. *Arch Dis Child*. 2020 Jun 30;archdischild-2020-319872.
12. Bhopal S, Buckland A, McCrone R, Villis AI, Owens S. Who has been missed? Dramatic decrease in numbers of children seen for child protection assessments during the pandemic. *Archives of*



- 1  
2  
3 Disease in Childhood [Internet]. 2020 Jun 18 [cited 2020 Jun 20]; Available from:  
4 <https://adc.bmj.com/content/early/2020/06/17/archdischild-2020-319783>  
5  
6  
7 13. The PLOS Medicine Editors. Observational Studies: Getting Clear about Transparency  
8 [Internet]. 2014 [cited 2020 Jun 22]. Available from:  
9 <https://journals.plos.org/plosmedicine/article?id=10.1371/journal.pmed.1001711>  
10  
11 14. Sidebotham P, Brandon M, Bailey S, Belderson P, Dodsworth J, Garstang J, Harrison E, Retzer A,  
12 Sorensen P. Pathways to harm, pathways to prevention: a triennial analysis of serious case  
13 reviews 2011-14 [Internet]. [cited 2020 Jul 3]. Available from:  
14 [https://assets.publishing.service.gov.uk/government/uploads/system/uploads/attachment\\_da](https://assets.publishing.service.gov.uk/government/uploads/system/uploads/attachment_data/file/533826/Triennial_Analysis_of_SCRs_2011-2014_-_Pathways_to_harm_and_protection.pdf)  
15 [ta/file/533826/Triennial\\_Analysis\\_of\\_SCRs\\_2011-2014\\_-](https://assets.publishing.service.gov.uk/government/uploads/system/uploads/attachment_data/file/533826/Triennial_Analysis_of_SCRs_2011-2014_-_Pathways_to_harm_and_protection.pdf)  
16 [\\_\\_Pathways\\_to\\_harm\\_and\\_protection.pdf](https://assets.publishing.service.gov.uk/government/uploads/system/uploads/attachment_data/file/533826/Triennial_Analysis_of_SCRs_2011-2014_-_Pathways_to_harm_and_protection.pdf)  
17  
18 15. Brandon M, Sidebotham P, Belderson P, Cleaver H, Dickens J, Garstang J, Harris J, Sorensen P,  
19 Wate R. Complexity and challenge: a triennial analysis of Serious Case Reviews 2014-17  
20 [Internet]. [cited 2020 Jul 3]. Available from:  
21 [https://assets.publishing.service.gov.uk/government/uploads/system/uploads/attachment\\_da](https://assets.publishing.service.gov.uk/government/uploads/system/uploads/attachment_data/file/869586/TRIENNIAL_SCR_REPORT_2014_to_2017.pdf)  
22 [ta/file/869586/TRIENNIAL\\_SCR\\_REPORT\\_2014\\_to\\_2017.pdf](https://assets.publishing.service.gov.uk/government/uploads/system/uploads/attachment_data/file/869586/TRIENNIAL_SCR_REPORT_2014_to_2017.pdf)  
23  
24  
25 16. Chandan JS, Keerthy D, Zemedikun DT, Okoth K, Gokhale KM, Raza K, et al. The association  
26 between exposure to childhood maltreatment and the subsequent development of functional  
27 somatic and visceral pain syndromes. *EClinicalMedicine*. 2020 Jun;100392.  
28  
29 17. Chandan JS, Thomas T, Gokhale KM, Bandyopadhyay S, Taylor J, Nirantharakumar K. The  
30 burden of mental ill health associated with childhood maltreatment in the UK, using The Health  
31 Improvement Network database: a population-based retrospective cohort study. *The Lancet*  
32 *Psychiatry*. 2019 Nov;6(11):926–34.  
33  
34  
35 18. Widom CS, Czaja SJ, DuMont KA. Intergenerational transmission of child abuse and neglect:  
36 Real or detection bias? *Science*. 2015 Mar 27;347(6229):1480–5.  
37  
38 19. HM Government. Working Together to Safeguard Children A guide to inter-agency working to  
39 safeguard and promote the welfare of children [Internet]. Vol. 2020. 2018. Available from:  
40 [https://assets.publishing.service.gov.uk/government/uploads/system/uploads/attachment\\_da](https://assets.publishing.service.gov.uk/government/uploads/system/uploads/attachment_data/file/779401/Working_Together_to_Safeguard-Children.pdf)  
41 [ta/file/779401/Working\\_Together\\_to\\_Safeguard-Children.pdf](https://assets.publishing.service.gov.uk/government/uploads/system/uploads/attachment_data/file/779401/Working_Together_to_Safeguard-Children.pdf)  
42  
43  
44  
45

#### 46 Figure legends

47  
48 Figure 1. Cumulative weekly CPME referrals by year for all referrals and school referrals

49  
50 Figure 2. Totals of weekly referrals by year and IRR comparing combined incidence for 2018/19  
51 against 2020 incidence  
52  
53  
54  
55  
56  
57  
58  
59  
60

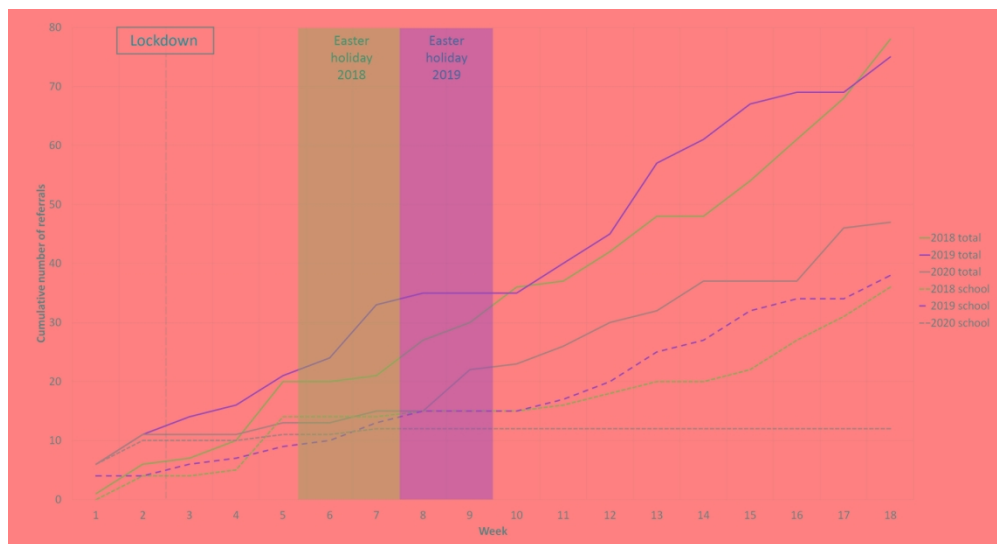

Figure 1. Cumulative weekly CPME referrals by year for all referrals and school referrals

297x159mm (300 x 300 DPI)

1  
2  
3  
4  
5  
6  
7  
8  
9  
10  
11  
12  
13  
14  
15  
16  
17  
18  
19  
20  
21  
22  
23  
24  
25  
26  
27  
28  
29  
30  
31  
32  
33  
34  
35  
36  
37  
38  
39  
40  
41  
42  
43  
44  
45  
46  
47  
48  
49  
50  
51  
52  
53  
54  
55  
56  
57  
58  
59  
60

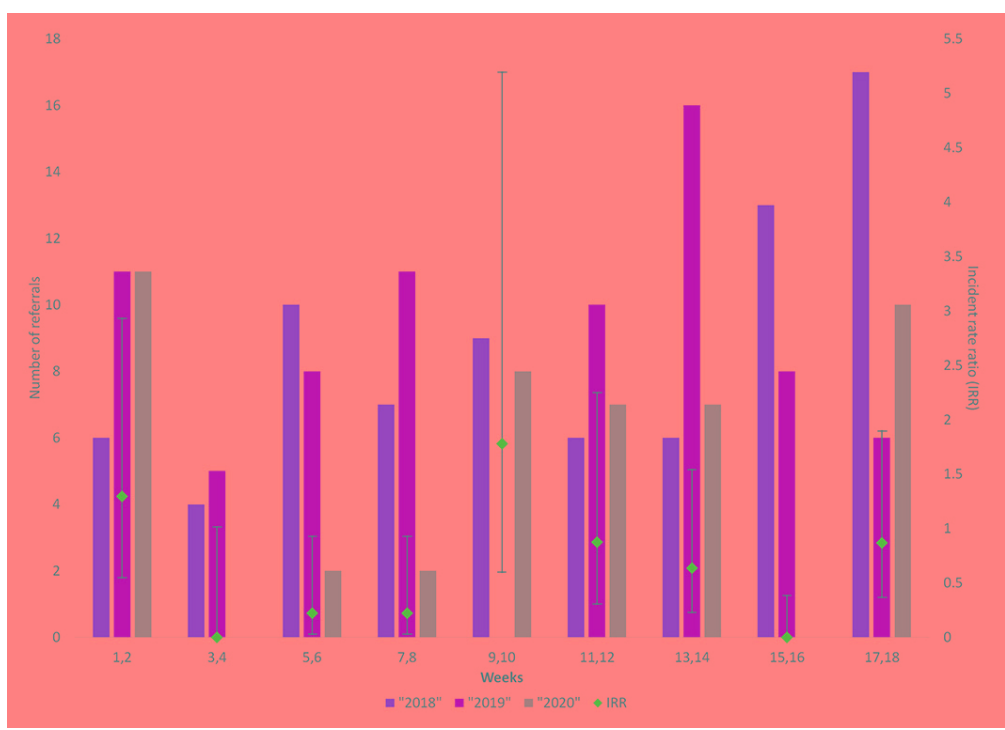

Figure 2. Totals of weekly referrals by year and IRR comparing combined incidence for 2018/19 against 2020 incidence

Supplementary Information Table 1 Extraction form

|                     |    |                                                                                                                    |                                                                                                                                                                |
|---------------------|----|--------------------------------------------------------------------------------------------------------------------|----------------------------------------------------------------------------------------------------------------------------------------------------------------|
| Demo-graphics       | 1  | Unique study number                                                                                                |                                                                                                                                                                |
|                     | 2  | year                                                                                                               |                                                                                                                                                                |
|                     | 3  | Week of medical                                                                                                    |                                                                                                                                                                |
|                     | 4  | Age in completed months                                                                                            |                                                                                                                                                                |
|                     | 5  | School status                                                                                                      | Less than mandatory school age/reception – year 6/ year7-11/sixth form - college                                                                               |
|                     | 6  | Special school                                                                                                     | Yes/No                                                                                                                                                         |
|                     | 7  | Sex                                                                                                                | Male/female                                                                                                                                                    |
|                     | 8  | Where does child normally live?                                                                                    | Birth parents/Special Guardian or kinship care/Foster care/Residential home or school/other                                                                    |
| Referral details    | 9  | Index case or referred as sibling/household group for CP medicals (including sibling inpatient with NAI)           | Index case/sibling or household group                                                                                                                          |
|                     | 10 | Who is the allegation against?                                                                                     | Family or household contacts/professionals                                                                                                                     |
|                     | 11 | Source of initial disclosure of potential safeguarding incident (who did child first tell OR who first saw injury) | School or Early Years staff/social care staff /police/family member/ foster carer/medical professional /sibling NAI inpatient/other please state               |
| Social care history | 12 | Was child referred to social care prior to needing this child protection medical?                                  | Yes/No                                                                                                                                                         |
|                     | 13 | If yes:<br>Current social care status at time that concerns were raised which led to this medical.                 | Investigation in progress/support from Family support worker /Child in Need/Child Protection Plan/ Child disability team/referred but NFA/other – please state |
|                     | 14 | Has child ever been on Child Protection Plan?                                                                      | Yes/No                                                                                                                                                         |
| Outcomes            | 15 | Are there any physical findings to support NAI or neglect?                                                         | Yes/No                                                                                                                                                         |
|                     | 16 | If yes:<br>Physical Findings (can choose more than one, exclude accidental injuries)                               | Bruise/Burn /Abrasion/ Scar /implement mark/ human bite mark/laceration/neglect/Other/                                                                         |
|                     | 17 | Likelihood of non-accidental injury (NAI)                                                                          | Injury consistent with NAI/ injury not consistent with NAI or no injury seen                                                                                   |
|                     | 18 | If consistent with NAI: Extent of non-accidental injuries<br>Are there NAI on more than one part of the body?      | Yes/No                                                                                                                                                         |
|                     | 19 | If consistent with NAI:<br>Are there injuries consistent with previous NAI?                                        | Yes/No                                                                                                                                                         |
|                     | 20 | Based on all the evidence in the report does the report indicate significant safeguarding concerns?                | Yes/No<br><i>If No STOP HERE</i>                                                                                                                               |

|  |    |                                                                               |                                                                                                 |
|--|----|-------------------------------------------------------------------------------|-------------------------------------------------------------------------------------------------|
|  | 21 | Are these concerns related to other factors than NAI?                         | Yes/No                                                                                          |
|  | 22 | What are the significant safeguarding concerns?<br>(can choose more than one) | Physical abuse/emotional abuse/<br>domestic violence/neglect/sexual<br>abuse/child exploitation |

For peer review only

Supplementary Table 2 Full details of demographics, referrals, social care history and outcomes.

|                                                                                                   | All        | 2018      | 2019      | 2020      | p    |
|---------------------------------------------------------------------------------------------------|------------|-----------|-----------|-----------|------|
| <b>Sample N</b>                                                                                   | 200        | 78        | 75        | 47        |      |
| <b>Age in months Median (IQR)</b>                                                                 | 69 (85)    | 72.5 (76) | 70 (109)  | 55 (77)   | .598 |
| <b>Gender N Female (%)</b>                                                                        | 73 (36.5)  | 32 (41.0) | 31 (41.3) | 10 (21.3) | .046 |
| <b>School status N (%)</b>                                                                        |            |           |           |           |      |
| Pre-school                                                                                        | 85 (42.5)  | 34 (43.6) | 30 (40.0) | 21 (44.7) |      |
| Primary (Reception – Year 6)                                                                      | 78 (39.0)  | 32 (41.0) | 26 (34.7) | 20 (42.6) |      |
| Secondary (Year 7-11)                                                                             | 32 (16.0)  | 11 (14.1) | 16 (21.3) | 5 (10.6)  |      |
| College / 6 <sup>th</sup> form (Year 12-13)                                                       | 5 (2.5)    | 1 (1.3)   | 3 (4.0)   | 1 (2.1)   | .637 |
| <b>Special school N Yes (%)</b>                                                                   | 9 (4.5)    | 5 (6.4)   | 3 (4.0)   | 1 (2.1)   | .516 |
| <b>Where child lives N (%)</b>                                                                    |            |           |           |           |      |
| Birth parents                                                                                     | 176 (88)   | 69 (88.5) | 65 (86.7) | 42 (89.4) |      |
| Special Guardianship or kinship care                                                              | 12 (6.0)   | 3 (3.8)   | 6 (8.0)   | 3 (6.4)   |      |
| Foster care                                                                                       | 7 (3.5)    | 5 (6.4)   | 2 (2.7)   | 0 (0.0)   |      |
| Residential home or school                                                                        | 3 (1.5)    | 1 (1.3)   | 2 (2.7)   | 0 (0.0)   |      |
| Other                                                                                             | 2 (1.0)    | 0 (0.0)   | 0 (0.0)   | 2 (1.0)   | .121 |
| <b>Is child an index case (vs sibling or household contact) N Yes (%)</b>                         | 134 (67)   | 46 (59.0) | 56 (74.7) | 32 (68.1) | .117 |
| <b>Allegation against N (%)</b>                                                                   |            |           |           |           |      |
| Family or household                                                                               | 189 (94.5) | 73 (93.6) | 70 (93.3) | 46 (97.9) |      |
| Professional                                                                                      | 11 (5.5)   | 5 (6.4)   | 5 (6.7)   | 1 (2.1)   | .509 |
| <b>Source of referral (who did child disclose abuse to, or who initiated CPME referral) N (%)</b> |            |           |           |           |      |
| School or Early Years staff                                                                       | 86 (43.9)  | 36 (47.4) | 38 (52.1) | 12 (25.5) |      |
| Social care staff                                                                                 | 22 (11.2)  | 10 (13.2) | 3 (4.1)   | 9 (19.1)  |      |
| Police                                                                                            | 22 (11.2)  | 11 (14.5) | 7 (9.6)   | 4 (8.5)   |      |
| Family member                                                                                     | 36 (18.4)  | 9 (11.8)  | 17 (23.3) | 10 (21.3) |      |
| Medical professional                                                                              | 4 (2.0)    | 2 (2.6)   | 2 (2.7)   | 0 (0.0)   |      |
| Foster carer                                                                                      | 7 (3.6)    | 1 (1.3)   | 2 (2.7)   | 4 (8.5)   |      |
| Sibling current inpatient due to NAI                                                              | 12 (6.1)   | 6 (7.9)   | 1 (1.4)   | 5 (10.6)  |      |
| Other                                                                                             | 7 (3.6)    | 1 (1.3)   | 3 (4.1)   | 3 (6.4)   | .015 |
| <b>Was child known to social care prior to CPME referral? N Yes (%)</b>                           | 151 (75.9) | 58 (74.4) | 56 (75.7) | 37 (78.7) | .857 |
| <b>Is child an open case to social care now N Yes (%)</b>                                         | 106 (53.3) | 39 (50.0) | 38 (51.4) | 29 (61.7) | .409 |
| <b>Has child ever been on CP plan N Yes (%)</b>                                                   | 77 (38.7)  | 26 (33.3) | 29 (39.2) | 22 (46.8) | .323 |
| <b>Are there physical findings to support NAI or neglect N Yes (%)</b>                            | 98 (51.0)  | 32 (41.0) | 46 (59.0) | 27 (57.4) | .071 |
| <b>Physical findings</b>                                                                          |            |           |           |           |      |
| Bruise                                                                                            | 128        | 21        | 25        | 21        |      |
| Burn                                                                                              | 36         | 2         | 2         | 2         |      |

|                                                                              |            |           |           |           |      |
|------------------------------------------------------------------------------|------------|-----------|-----------|-----------|------|
| Abrasion                                                                     | 29         | 7         | 10        | 7         |      |
| Scar                                                                         | 11         | 3         | 3         | 3         |      |
| Implement mark                                                               | 9          | 6         | 1         | 2         |      |
| Human bite mark                                                              | 6          | 2         | 1         | 2         |      |
| Laceration                                                                   | 5          | 1         | 2         | 2         |      |
| Neglect                                                                      | 19         | 7         | 6         | 6         |      |
| Other                                                                        | 4          | 1         | 0         | 3         |      |
| <b>Number of types of NAI Median (IQR)</b>                                   | 1 (1)      | 1 (1)     | 1 (1)     | 1.5 (1)   | .277 |
| <b>Likelihood of NAI N Consistent with NAI (%)</b>                           | 89 (46.4)  | 28 (35.9) | 35 (52.2) | 26 (55.3) | .053 |
| <b>NAI on more than one part of body N Yes (%)</b>                           | 48 (54.5)  | 16 (57.1) | 18 (52.9) | 14 (53.8) | .943 |
| <b>Are there injuries consistent with previous NAI? N Yes (%)</b>            | 15 (17.2)  | 4 (14.8)  | 4 (11.8)  | 7 (26.9)  | .282 |
| <b>Does the report indicate significant safeguarding concerns? N Yes (%)</b> | 180 (93.8) | 69 (88.5) | 64 (95.5) | 47 (100)  | .014 |
| <b>Are there concerns related to non-NAI safeguarding factors? N Yes (%)</b> | 132 (73.3) | 52 (75.4) | 47 (73.4) | 33 (70.2) | .898 |
| <b>Other safeguarding concerns</b>                                           |            |           |           |           |      |
| Physical abuse                                                               | 154        | 59        | 54        | 41        |      |
| Emotional abuse                                                              | 34         | 13        | 15        | 6         |      |
| Domestic violenc                                                             | 60         | 24        | 25        | 11        |      |
| Neglect                                                                      | 62         | 25        | 1         | 19        |      |
| Sexual abuse                                                                 | 4          | 1         | 2         | 1         |      |
| Child exploitation                                                           | 7          | 3         | 2         | 2         | .845 |

## STROBE Statement—checklist of items that should be included in reports of observational studies

|                              | Item No | Recommendation                                                                                                                                                                                                                                                                                                                                                                                                                                                         | Page No                                |
|------------------------------|---------|------------------------------------------------------------------------------------------------------------------------------------------------------------------------------------------------------------------------------------------------------------------------------------------------------------------------------------------------------------------------------------------------------------------------------------------------------------------------|----------------------------------------|
| <b>Title and abstract</b>    | 1       | (a) Indicate the study's design with a commonly used term in the title or the abstract                                                                                                                                                                                                                                                                                                                                                                                 | 3                                      |
|                              |         | (b) Provide in the abstract an informative and balanced summary of what was done and what was found                                                                                                                                                                                                                                                                                                                                                                    | 3                                      |
| <b>Introduction</b>          |         |                                                                                                                                                                                                                                                                                                                                                                                                                                                                        |                                        |
| Background/rationale         | 2       | Explain the scientific background and rationale for the investigation being reported                                                                                                                                                                                                                                                                                                                                                                                   | 4-5                                    |
| Objectives                   | 3       | State specific objectives, including any prespecified hypotheses                                                                                                                                                                                                                                                                                                                                                                                                       | 5                                      |
| <b>Methods</b>               |         |                                                                                                                                                                                                                                                                                                                                                                                                                                                                        |                                        |
| Study design                 | 4       | Present key elements of study design early in the paper                                                                                                                                                                                                                                                                                                                                                                                                                | 5                                      |
| Setting                      | 5       | Describe the setting, locations, and relevant dates, including periods of recruitment, exposure, follow-up, and data collection                                                                                                                                                                                                                                                                                                                                        | 5                                      |
| Participants                 | 6       | (a) <i>Cohort study</i> —Give the eligibility criteria, and the sources and methods of selection of participants. Describe methods of follow-up<br><i>Case-control study</i> —Give the eligibility criteria, and the sources and methods of case ascertainment and control selection. Give the rationale for the choice of cases and controls<br><i>Cross-sectional study</i> —Give the eligibility criteria, and the sources and methods of selection of participants | 5                                      |
|                              |         | (b) <i>Cohort study</i> —For matched studies, give matching criteria and number of exposed and unexposed<br><i>Case-control study</i> —For matched studies, give matching criteria and the number of controls per case                                                                                                                                                                                                                                                 | n/a                                    |
| Variables                    | 7       | Clearly define all outcomes, exposures, predictors, potential confounders, and effect modifiers. Give diagnostic criteria, if applicable                                                                                                                                                                                                                                                                                                                               | 5-6                                    |
| Data sources/<br>measurement | 8*      | For each variable of interest, give sources of data and details of methods of assessment (measurement). Describe comparability of assessment methods if there is more than one group                                                                                                                                                                                                                                                                                   | 5<br><i>Figures 1 &amp; 2, Table 1</i> |
| Bias                         | 9       | Describe any efforts to address potential sources of bias                                                                                                                                                                                                                                                                                                                                                                                                              | 6                                      |
| Study size                   | 10      | Explain how the study size was arrived at                                                                                                                                                                                                                                                                                                                                                                                                                              | 6                                      |
| Quantitative variables       | 11      | Explain how quantitative variables were handled in the analyses. If applicable, describe which groupings were chosen and why                                                                                                                                                                                                                                                                                                                                           | 5-6                                    |
| Statistical methods          | 12      | (a) Describe all statistical methods, including those used to control for confounding                                                                                                                                                                                                                                                                                                                                                                                  | 6                                      |
|                              |         | (b) Describe any methods used to examine subgroups and interactions                                                                                                                                                                                                                                                                                                                                                                                                    | 6                                      |
|                              |         | (c) Explain how missing data were addressed                                                                                                                                                                                                                                                                                                                                                                                                                            | n/a                                    |
|                              |         | (d) <i>Cohort study</i> —If applicable, explain how loss to follow-up was addressed<br><i>Case-control study</i> —If applicable, explain how matching of cases and controls was addressed                                                                                                                                                                                                                                                                              | n/a                                    |



1  
2  
3  
4  
5  
6  
7  
8  
9  
10  
11  
12  
13  
14  
15  
16  
17  
18  
19  
20  
21  
22  
23  
24  
25  
26  
27  
28  
29  
30  
31  
32  
33  
34  
35  
36  
37  
38  
39  
40  
41  
42  
43  
44  
45  
46  
47  
48  
49  
50  
51  
52  
53  
54  
55  
56  
57  
58  
59  
60**Results**

|                  |     |                                                                                                                                                                                                                                                                                                 |                |
|------------------|-----|-------------------------------------------------------------------------------------------------------------------------------------------------------------------------------------------------------------------------------------------------------------------------------------------------|----------------|
| Participants     | 13* | (a) Report numbers of individuals at each stage of study—eg numbers potentially eligible, examined for eligibility, confirmed eligible, included in the study, completing follow-up, and analysed<br>(b) Give reasons for non-participation at each stage<br>(c) Consider use of a flow diagram | 7              |
| Descriptive data | 14* | (a) Give characteristics of study participants (eg demographic, clinical, social) and information on exposures and potential confounders                                                                                                                                                        | 8              |
|                  |     | (b) Indicate number of participants with missing data for each variable of interest                                                                                                                                                                                                             | 8              |
|                  |     | (c) <i>Cohort study</i> —Summarise follow-up time (eg, average and total amount)                                                                                                                                                                                                                | n/a            |
| Outcome data     | 15* | <i>Cohort study</i> —Report numbers of outcome events or summary measures over time                                                                                                                                                                                                             | n/a            |
|                  |     | <i>Case-control study</i> —Report numbers in each exposure category, or summary measures of exposure                                                                                                                                                                                            | n/a            |
|                  |     | <i>Cross-sectional study</i> —Report numbers of outcome events or summary measures                                                                                                                                                                                                              | 7-8<br>Table 1 |
| Main results     | 16  | (a) Give unadjusted estimates and, if applicable, confounder-adjusted estimates and their precision (eg, 95% confidence interval). Make clear which confounders were adjusted for and why they were included                                                                                    | 8-9            |
|                  |     | (b) Report category boundaries when continuous variables were categorized                                                                                                                                                                                                                       |                |
|                  |     | (c) If relevant, consider translating estimates of relative risk into absolute risk for a meaningful time period                                                                                                                                                                                |                |
| Other analyses   | 17  | Report other analyses done—eg analyses of subgroups and interactions, and sensitivity analyses                                                                                                                                                                                                  | n/a            |

**Discussion**

|                  |    |                                                                                                                                                                            |      |
|------------------|----|----------------------------------------------------------------------------------------------------------------------------------------------------------------------------|------|
| Key results      | 18 | Summarise key results with reference to study objectives                                                                                                                   | 8    |
| Limitations      | 19 | Discuss limitations of the study, taking into account sources of potential bias or imprecision. Discuss both direction and magnitude of any potential bias                 | 8-9  |
| Interpretation   | 20 | Give a cautious overall interpretation of results considering objectives, limitations, multiplicity of analyses, results from similar studies, and other relevant evidence | 9-10 |
| Generalisability | 21 | Discuss the generalisability (external validity) of the study results                                                                                                      | 9-10 |

**Other information**

|         |    |                                                                                                                                                               |     |
|---------|----|---------------------------------------------------------------------------------------------------------------------------------------------------------------|-----|
| Funding | 22 | Give the source of funding and the role of the funders for the present study and, if applicable, for the original study on which the present article is based | 12  |
|         |    | <i>Cross-sectional study</i> —If applicable, describe analytical methods taking account of sampling strategy                                                  |     |
|         |    | (e) Describe any sensitivity analyses                                                                                                                         | n/a |
