# Supplementary material for: Effect of COVID-19 lockdown on child protection medical assessments: a retrospective observational study in Birmingham, UK
Source: PubMed Central journal article supplement — BMJ Open. 2020 Sep 29;10(9):e042867. doi: 10.1136/bmjopen-2020-042867 (PMC7526028; doi:10.1136/bmjopen-2020-042867), 2020-09-29
Supplement: bmjopen-2020-042867supp001.pdf [file bmjopen-2020-042867supp001.pdf]

Supplementary Information Table 1 Extraction form

|                     |    |                                                                                                                    |                                                                                                                                                                |
|---------------------|----|--------------------------------------------------------------------------------------------------------------------|----------------------------------------------------------------------------------------------------------------------------------------------------------------|
| Demo-graphics       | 1  | Unique study number                                                                                                |                                                                                                                                                                |
|                     | 2  | year                                                                                                               |                                                                                                                                                                |
|                     | 3  | Week of medical                                                                                                    |                                                                                                                                                                |
|                     | 4  | Age in completed months                                                                                            |                                                                                                                                                                |
|                     | 5  | School status                                                                                                      | Less than mandatory school age/reception – year 6/ year7-11/sixth form - college                                                                               |
|                     | 6  | Special school                                                                                                     | Yes/No                                                                                                                                                         |
|                     | 7  | Sex                                                                                                                | Male/female                                                                                                                                                    |
|                     | 8  | Where does child normally live?                                                                                    | Birth parents/Special Guardian or kinship care/Foster care/Residential home or school/other                                                                    |
| Referral details    | 9  | Index case or referred as sibling/household group for CP medicals (including sibling inpatient with NAI)           | Index case/sibling or household group                                                                                                                          |
|                     | 10 | Who is the allegation against?                                                                                     | Family or household contacts/professionals                                                                                                                     |
|                     | 11 | Source of initial disclosure of potential safeguarding incident (who did child first tell OR who first saw injury) | School or Early Years staff/social care staff /police/family member/ foster carer/medical professional /sibling NAI inpatient/other please state               |
| Social care history | 12 | Was child referred to social care prior to needing this child protection medical?                                  | Yes/No                                                                                                                                                         |
|                     | 13 | If yes:<br>Current social care status at time that concerns were raised which led to this medical.                 | Investigation in progress/support from Family support worker /Child in Need/Child Protection Plan/ Child disability team/referred but NFA/other – please state |
|                     | 14 | Has child ever been on Child Protection Plan?                                                                      | Yes/No                                                                                                                                                         |
| Outcomes            | 15 | Are there any physical findings to support NAI or neglect?                                                         | Yes/No                                                                                                                                                         |
|                     | 16 | If yes:<br>Physical Findings (can choose more than one, exclude accidental injuries)                               | Bruise/Burn /Abrasion/ Scar /implement mark/ human bite mark/laceration/neglect/Other/                                                                         |
|                     | 17 | Likelihood of non-accidental injury (NAI)                                                                          | Injury consistent with NAI/ injury not consistent with NAI or no injury seen                                                                                   |
|                     | 18 | If consistent with NAI: Extent of non-accidental injuries<br>Are there NAI on more than one part of the body?      | Yes/No                                                                                                                                                         |
|                     | 19 | If consistent with NAI:<br>Are there injuries consistent with previous NAI?                                        | Yes/No                                                                                                                                                         |
|                     | 20 | Based on all the evidence in the report does the report indicate significant safeguarding concerns?                | Yes/No<br><i>If No STOP HERE</i>                                                                                                                               |

|  |    |                                                                               |                                                                                                 |
|--|----|-------------------------------------------------------------------------------|-------------------------------------------------------------------------------------------------|
|  | 21 | Are these concerns related to other factors than NAI?                         | Yes/No                                                                                          |
|  | 22 | What are the significant safeguarding concerns?<br>(can choose more than one) | Physical abuse/emotional abuse/<br>domestic violence/neglect/sexual<br>abuse/child exploitation |
