# Supplementary material for: Effect of COVID-19 lockdown on child protection medical assessments: a retrospective observational study in Birmingham, UK
Source: PubMed Central journal article supplement — BMJ Open. 2020 Sep 29;10(9):e042867. doi: 10.1136/bmjopen-2020-042867 (PMC7526028; doi:10.1136/bmjopen-2020-042867), 2020-09-29
Supplement: bmjopen-2020-042867supp002.pdf [file bmjopen-2020-042867supp002.pdf]

Supplementary Table 2 Full details of demographics, referrals, social care history and outcomes.

|                                                                                                   | All        | 2018      | 2019      | 2020      | p    |
|---------------------------------------------------------------------------------------------------|------------|-----------|-----------|-----------|------|
| <b>Sample N</b>                                                                                   | 200        | 78        | 75        | 47        |      |
| <b>Age in months Median (IQR)</b>                                                                 | 69 (85)    | 72.5 (76) | 70 (109)  | 55 (77)   | .598 |
| <b>Gender N Female (%)</b>                                                                        | 73 (36.5)  | 32 (41.0) | 31 (41.3) | 10 (21.3) | .046 |
| <b>School status N (%)</b>                                                                        |            |           |           |           |      |
| Pre-school                                                                                        | 85 (42.5)  | 34 (43.6) | 30 (40.0) | 21 (44.7) |      |
| Primary (Reception – Year 6)                                                                      | 78 (39.0)  | 32 (41.0) | 26 (34.7) | 20 (42.6) |      |
| Secondary (Year 7-11)                                                                             | 32 (16.0)  | 11 (14.1) | 16 (21.3) | 5 (10.6)  |      |
| College / 6 <sup>th</sup> form (Year 12-13)                                                       | 5 (2.5)    | 1 (1.3)   | 3 (4.0)   | 1 (2.1)   | .637 |
| <b>Special school N Yes (%)</b>                                                                   | 9 (4.5)    | 5 (6.4)   | 3 (4.0)   | 1 (2.1)   | .516 |
| <b>Where child lives N (%)</b>                                                                    |            |           |           |           |      |
| Birth parents                                                                                     | 176 (88)   | 69 (88.5) | 65 (86.7) | 42 (89.4) |      |
| Special Guardianship or kinship care                                                              | 12 (6.0)   | 3 (3.8)   | 6 (8.0)   | 3 (6.4)   |      |
| Foster care                                                                                       | 7 (3.5)    | 5 (6.4)   | 2 (2.7)   | 0 (0.0)   |      |
| Residential home or school                                                                        | 3 (1.5)    | 1 (1.3)   | 2 (2.7)   | 0 (0.0)   |      |
| Other                                                                                             | 2 (1.0)    | 0 (0.0)   | 0 (0.0)   | 2 (1.0)   | .121 |
| <b>Is child an index case (vs sibling or household contact) N Yes (%)</b>                         | 134 (67)   | 46 (59.0) | 56 (74.7) | 32 (68.1) | .117 |
| <b>Allegation against N (%)</b>                                                                   |            |           |           |           |      |
| Family or household                                                                               | 189 (94.5) | 73 (93.6) | 70 (93.3) | 46 (97.9) |      |
| Professional                                                                                      | 11 (5.5)   | 5 (6.4)   | 5 (6.7)   | 1 (2.1)   | .509 |
| <b>Source of referral (who did child disclose abuse to, or who initiated CPME referral) N (%)</b> |            |           |           |           |      |
| School or Early Years staff                                                                       | 86 (43.9)  | 36 (47.4) | 38 (52.1) | 12 (25.5) |      |
| Social care staff                                                                                 | 22 (11.2)  | 10 (13.2) | 3 (4.1)   | 9 (19.1)  |      |
| Police                                                                                            | 22 (11.2)  | 11 (14.5) | 7 (9.6)   | 4 (8.5)   |      |
| Family member                                                                                     | 36 (18.4)  | 9 (11.8)  | 17 (23.3) | 10 (21.3) |      |
| Medical professional                                                                              | 4 (2.0)    | 2 (2.6)   | 2 (2.7)   | 0 (0.0)   |      |
| Foster carer                                                                                      | 7 (3.6)    | 1 (1.3)   | 2 (2.7)   | 4 (8.5)   |      |
| Sibling current inpatient due to NAI                                                              | 12 (6.1)   | 6 (7.9)   | 1 (1.4)   | 5 (10.6)  |      |
| Other                                                                                             | 7 (3.6)    | 1 (1.3)   | 3 (4.1)   | 3 (6.4)   | .015 |
| <b>Was child known to social care prior to CPME referral? N Yes (%)</b>                           | 151 (75.9) | 58 (74.4) | 56 (75.7) | 37 (78.7) | .857 |
| <b>Is child an open case to social care now N Yes (%)</b>                                         | 106 (53.3) | 39 (50.0) | 38 (51.4) | 29 (61.7) | .409 |
| <b>Has child ever been on CP plan N Yes (%)</b>                                                   | 77 (38.7)  | 26 (33.3) | 29 (39.2) | 22 (46.8) | .323 |
| <b>Are there physical findings to support NAI or neglect N Yes (%)</b>                            | 98 (51.0)  | 32 (41.0) | 46 (59.0) | 27 (57.4) | .071 |
| <b>Physical findings</b>                                                                          |            |           |           |           |      |
| Bruise                                                                                            | 128        | 21        | 25        | 21        |      |
| Burn                                                                                              | 36         | 2         | 2         | 2         |      |

|                                                                              |            |           |           |           |      |
|------------------------------------------------------------------------------|------------|-----------|-----------|-----------|------|
| Abrasion                                                                     | 29         | 7         | 10        | 7         |      |
| Scar                                                                         | 11         | 3         | 3         | 3         |      |
| Implement mark                                                               | 9          | 6         | 1         | 2         |      |
| Human bite mark                                                              | 6          | 2         | 1         | 2         |      |
| Laceration                                                                   | 5          | 1         | 2         | 2         |      |
| Neglect                                                                      | 19         | 7         | 6         | 6         |      |
| Other                                                                        | 4          | 1         | 0         | 3         |      |
| <b>Number of types of NAI Median (IQR)</b>                                   | 1 (1)      | 1 (1)     | 1 (1)     | 1.5 (1)   | .277 |
| <b>Likelihood of NAI N Consistent with NAI (%)</b>                           | 89 (46.4)  | 28 (35.9) | 35 (52.2) | 26 (55.3) | .053 |
| <b>NAI on more than one part of body N Yes (%)</b>                           | 48 (54.5)  | 16 (57.1) | 18 (52.9) | 14 (53.8) | .943 |
| <b>Are there injuries consistent with previous NAI? N Yes (%)</b>            | 15 (17.2)  | 4 (14.8)  | 4 (11.8)  | 7 (26.9)  | .282 |
| <b>Does the report indicate significant safeguarding concerns? N Yes (%)</b> | 180 (93.8) | 69 (88.5) | 64 (95.5) | 47 (100)  | .014 |
| <b>Are there concerns related to non-NAI safeguarding factors? N Yes (%)</b> | 132 (73.3) | 52 (75.4) | 47 (73.4) | 33 (70.2) | .898 |
| <b>Other safeguarding concerns</b>                                           |            |           |           |           |      |
| Physical abuse                                                               | 154        | 59        | 54        | 41        |      |
| Emotional abuse                                                              | 34         | 13        | 15        | 6         |      |
| Domestic violenc                                                             | 60         | 24        | 25        | 11        |      |
| Neglect                                                                      | 62         | 25        | 1         | 19        |      |
| Sexual abuse                                                                 | 4          | 1         | 2         | 1         |      |
| Child exploitation                                                           | 7          | 3         | 2         | 2         | .845 |
